# Supplementary material for: LSNR:GO template for BSA interaction, photo and sonocatalytic reductions of fluorescent dyes in aqueous solutions
Source: Royal Society of Chemistry journal article supplement (doi:10.1039/d2ya00274d), 2022-12-09
Supplement: d2ya00274d1.pdf [file d2ya00274d1.pdf]

# LSNR: GO template for BSA interaction, photo and sonocatalytic reductions of fluorescent dyes in aqueous solutions

Krishan Kumar, Bhargab Sahoo, Tara Chand Meghwal, Man Singh\*

[Krishan8053649040@gmail.com](mailto:Krishan8053649040@gmail.com), [rajatvlrc@gmail.com](mailto:rajatvlrc@gmail.com), [tarachandmeghwal9660@gmail.com](mailto:tarachandmeghwal9660@gmail.com),

[Mansingh50@hotmail.com](mailto:Mansingh50@hotmail.com)\*

School of Chemical Sciences, Central University of Gujarat, Gandhinagar

Sector-30(382030), India

## 1. Figures-

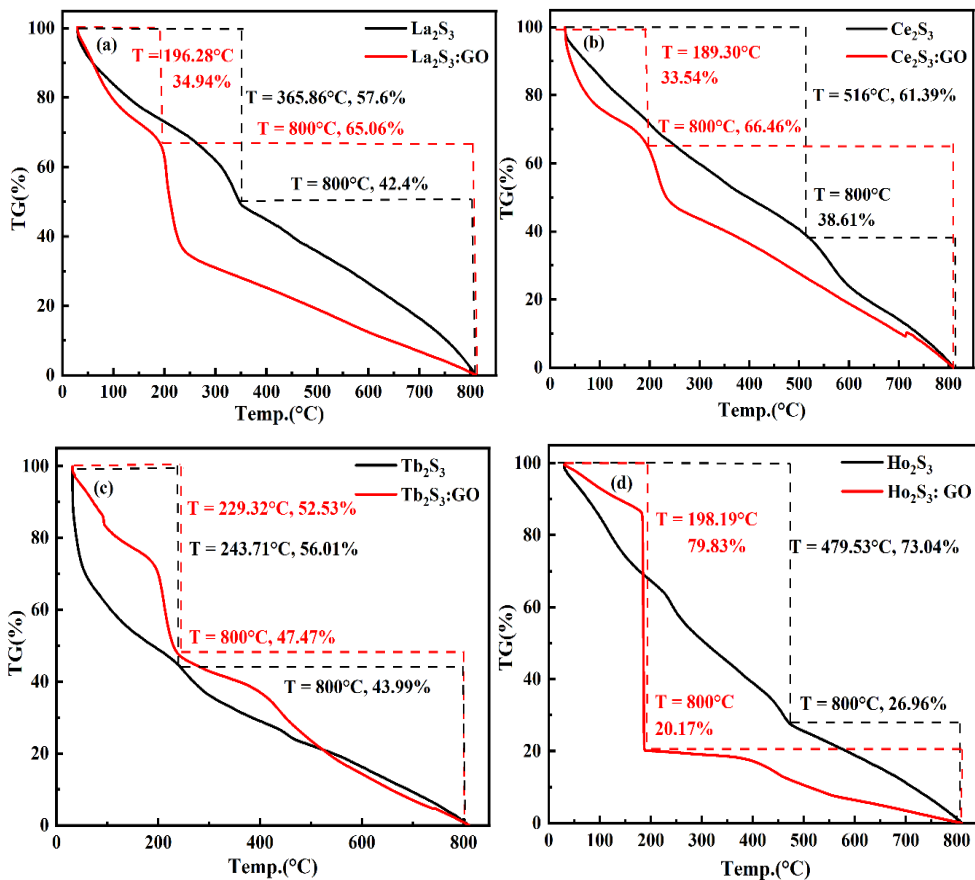

Figs. (SI-1.0). The difference in weight loss of LSNR and LGT.

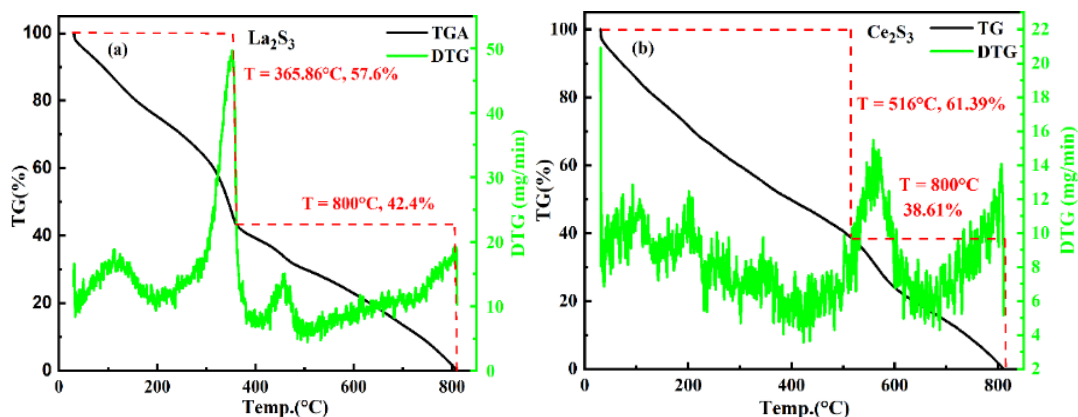

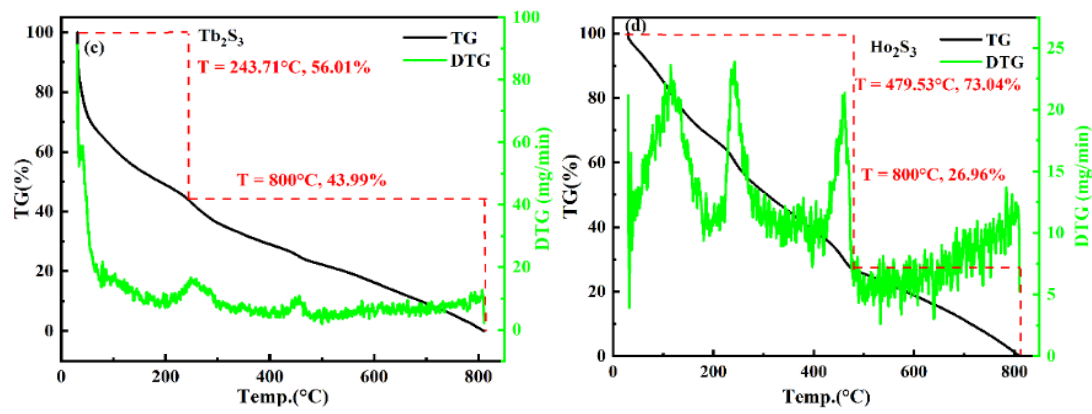

Figs. (SI-1.1). TGA and DTG of LSNR.

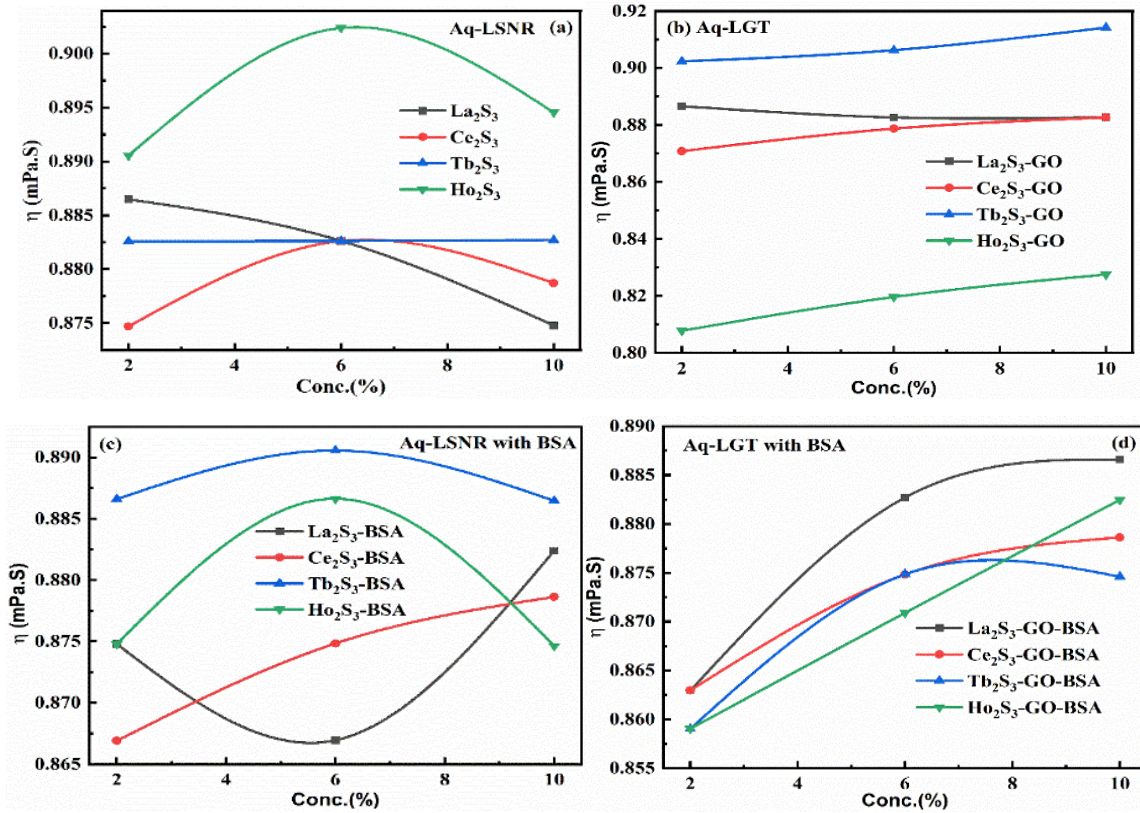

Figs. (SI-1.2). The viscosity vs. conc. of LSNR, LGT and with BSA.

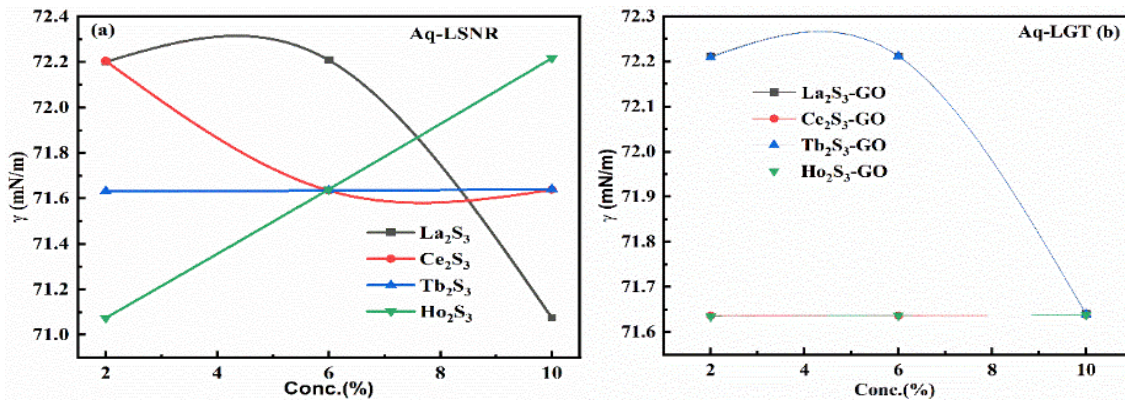



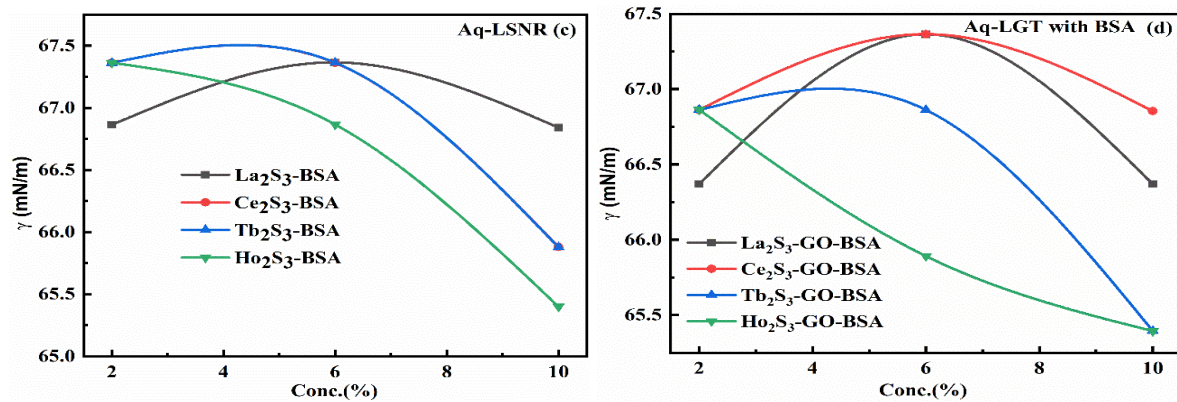

Figs. (SI-1.3). The surface tension vs conc. of LSNR, LGT and with BSA.

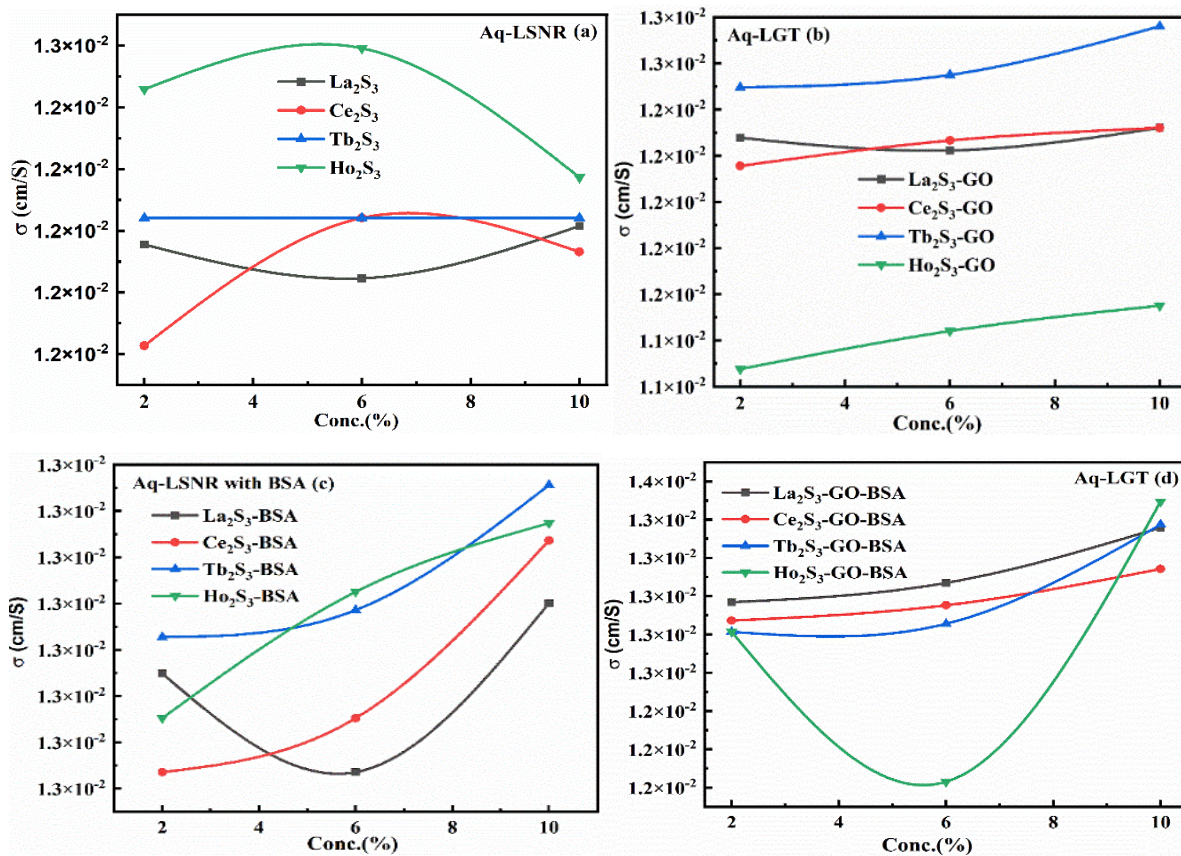

Figs. (SI-1.4). The surface friction coefficient vs conc. of LSNR, LGT and with BSA.

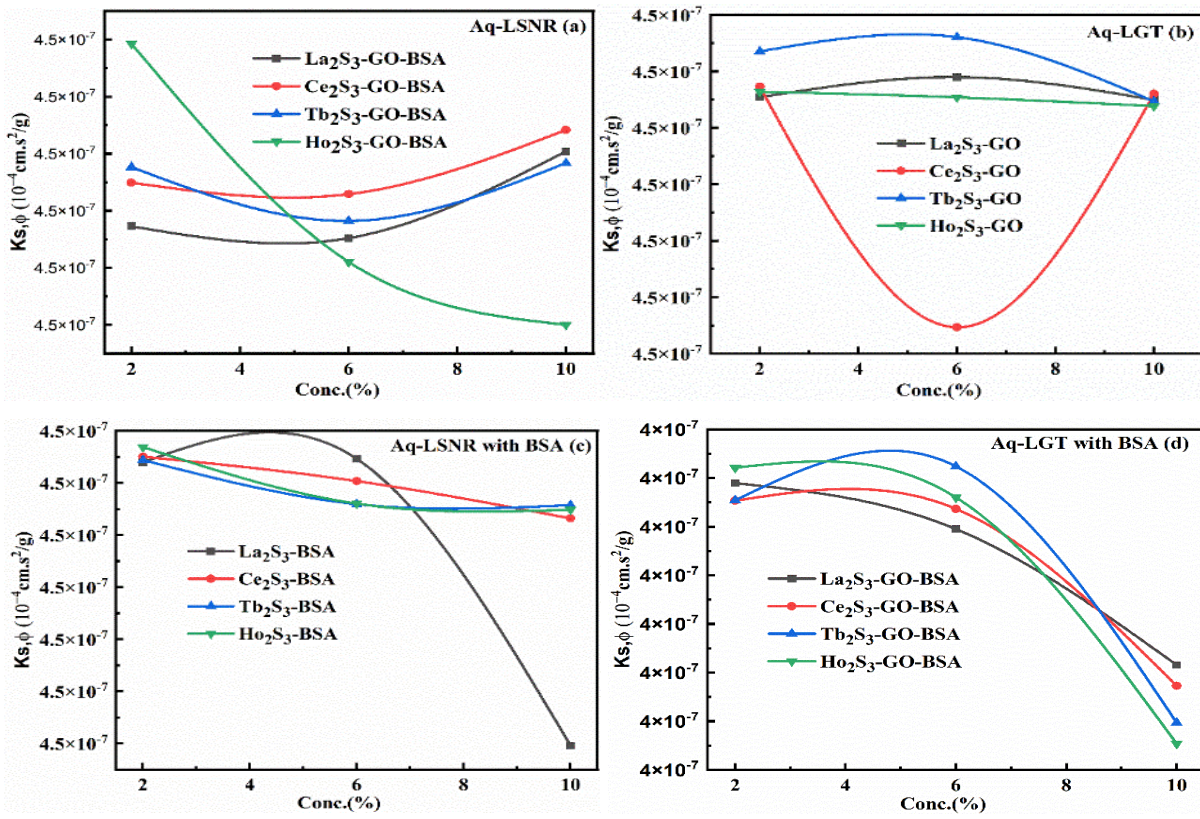

Figs. (SI-1.5). The isentropic compressibility vs conc of LSNR, LGT and with BSA.

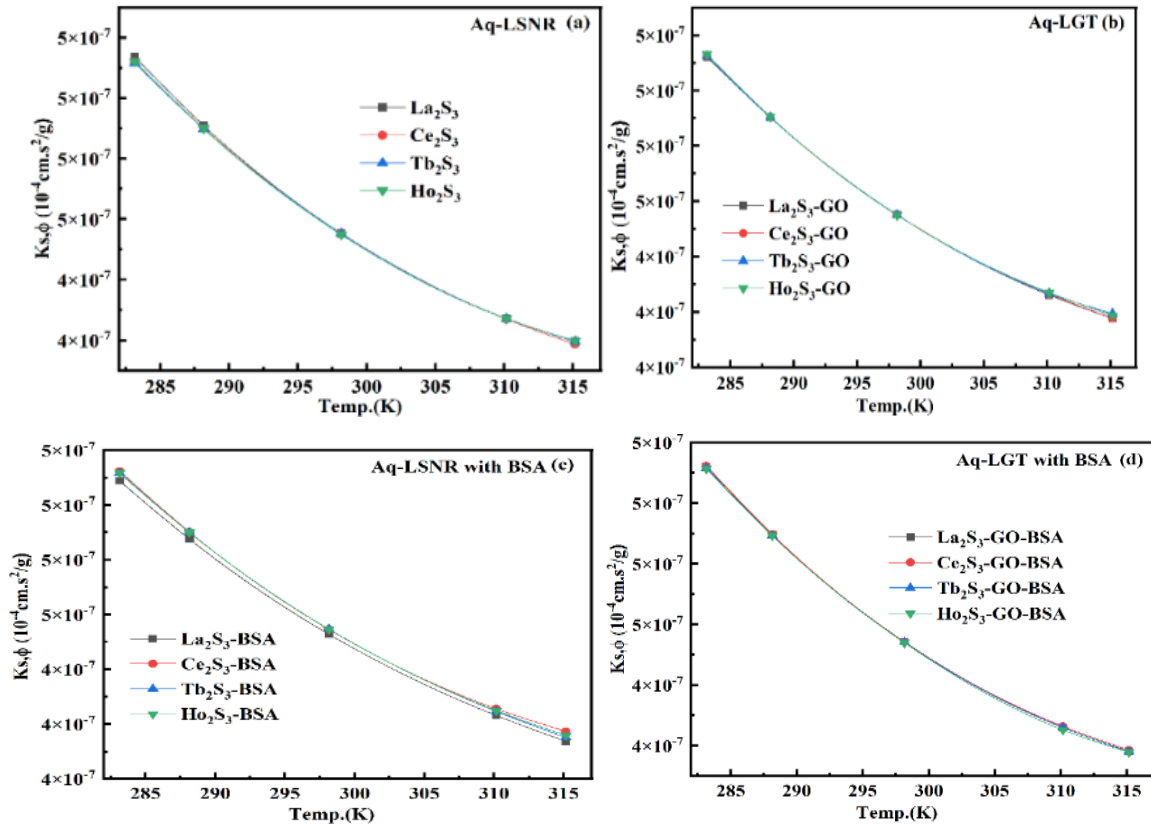

Figs. (SI-1.6). The isentropic compressibility vs temperature of LSNR, LGT with BSA at 5T.



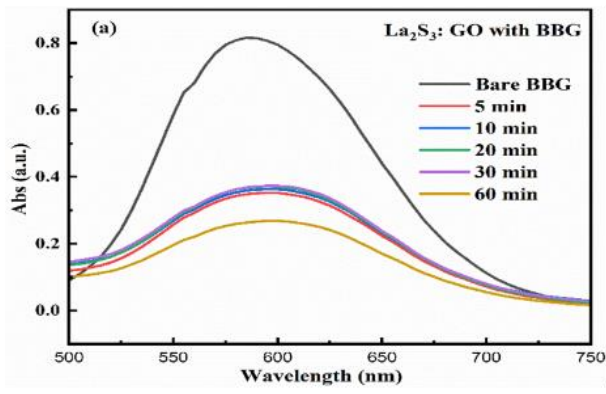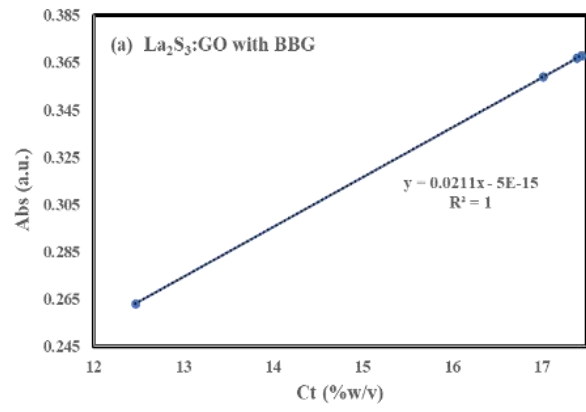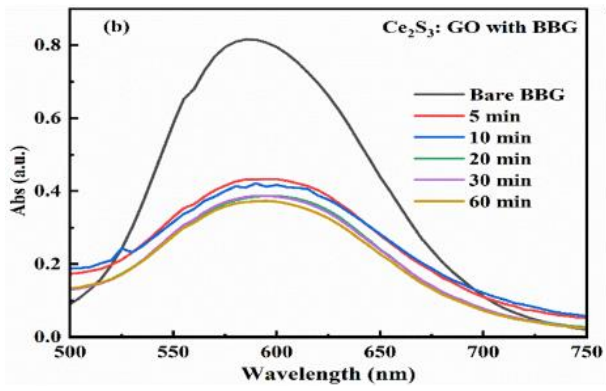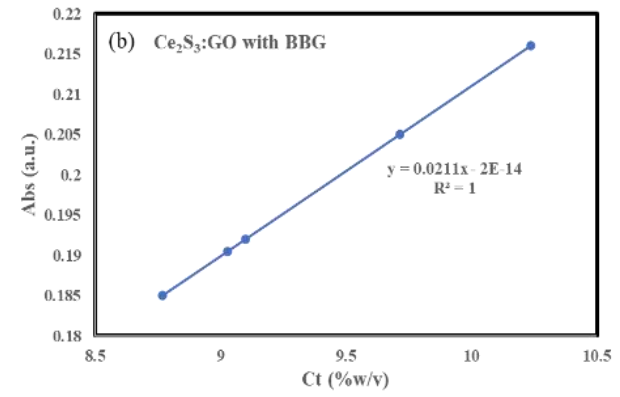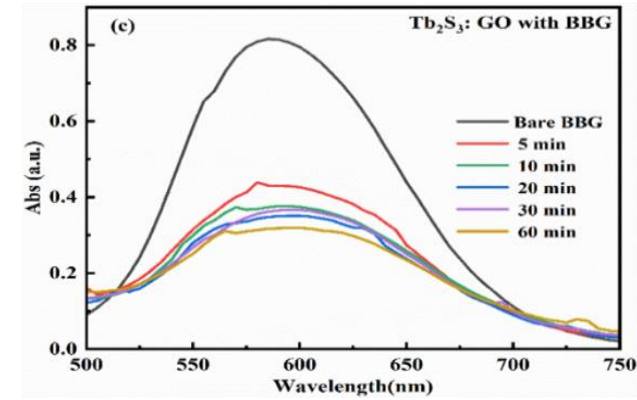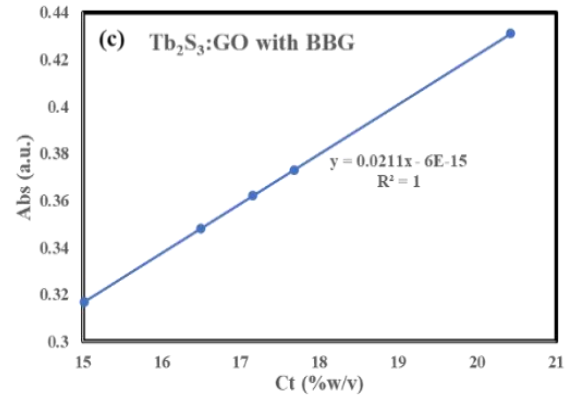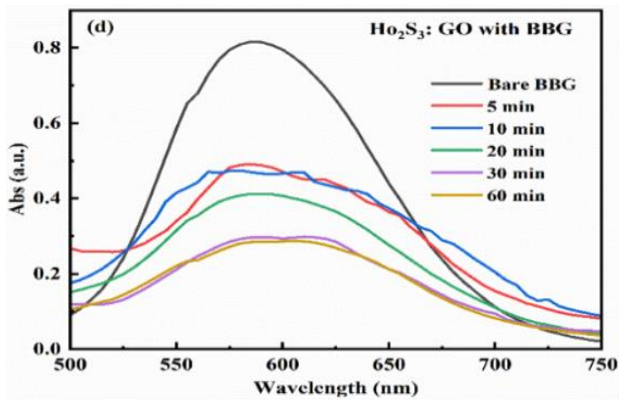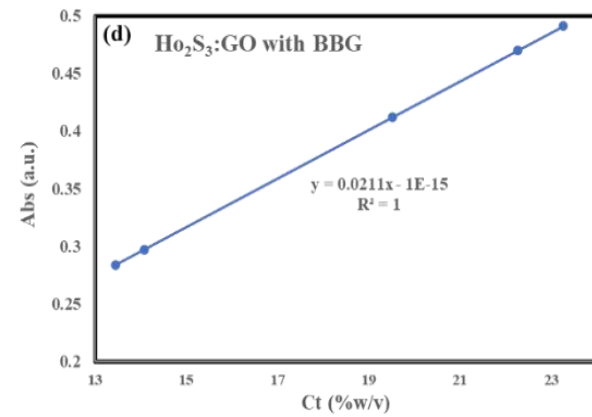

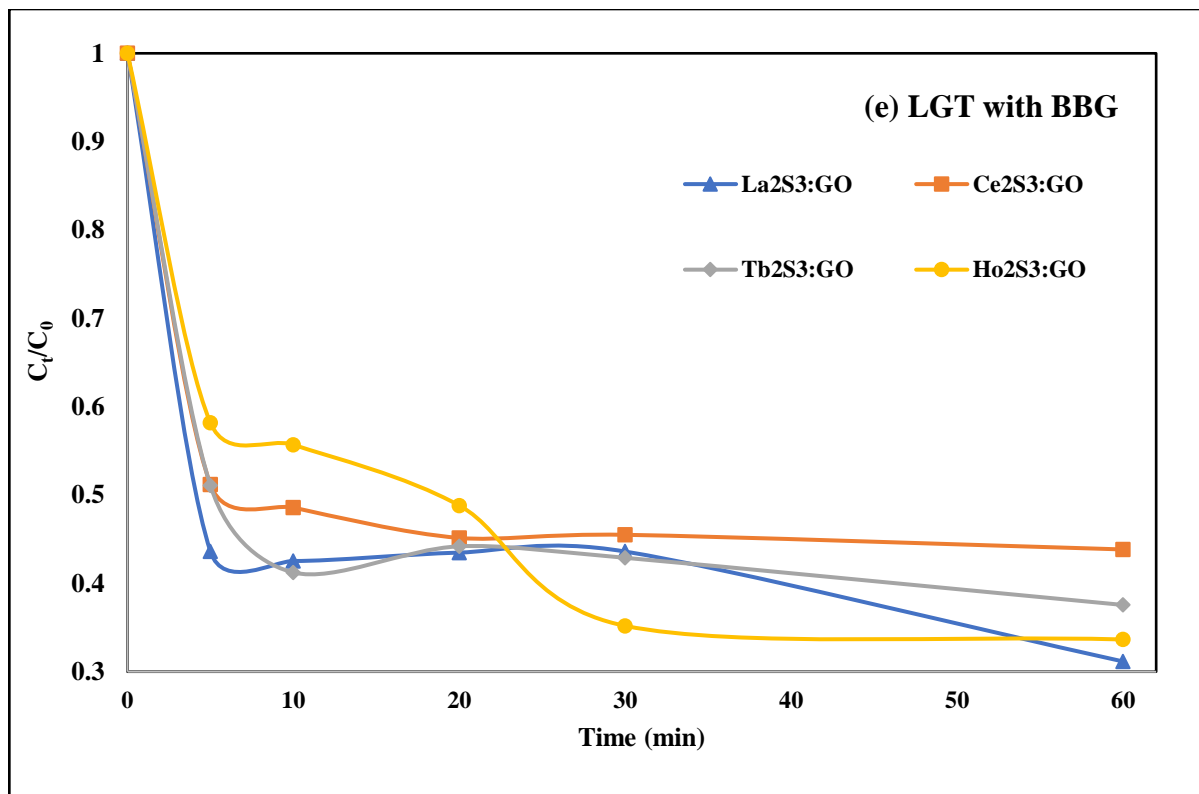

Figs. (SI-1.7). Sonocatalytic reduction activities and as a function of time with BBR.

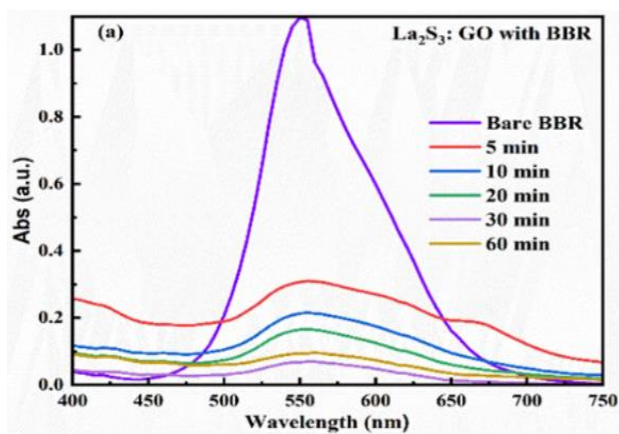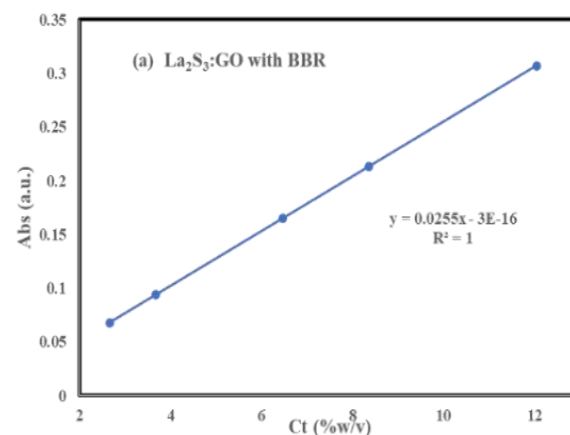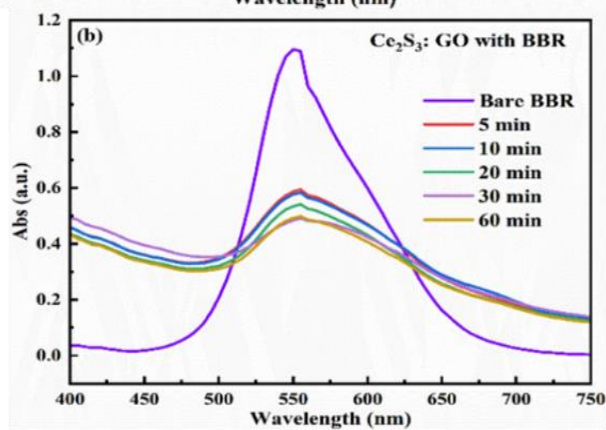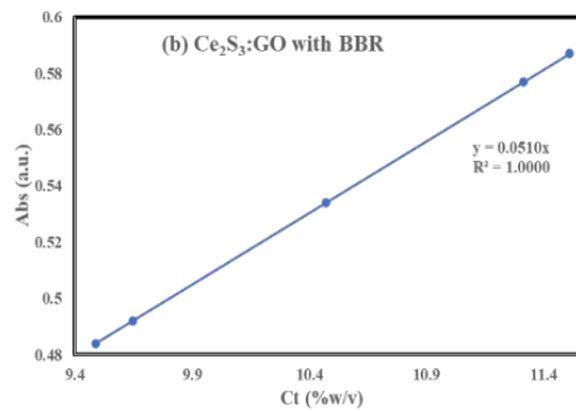

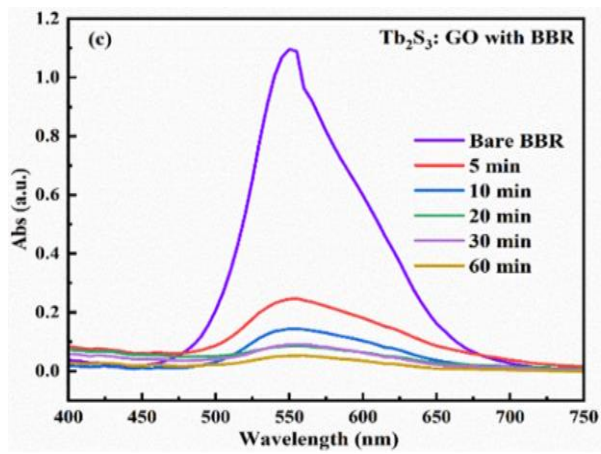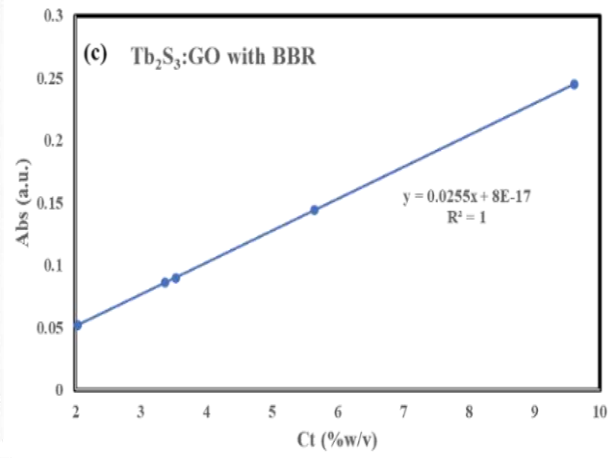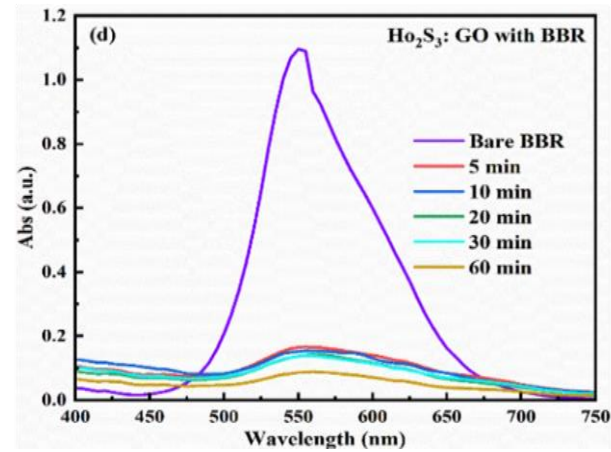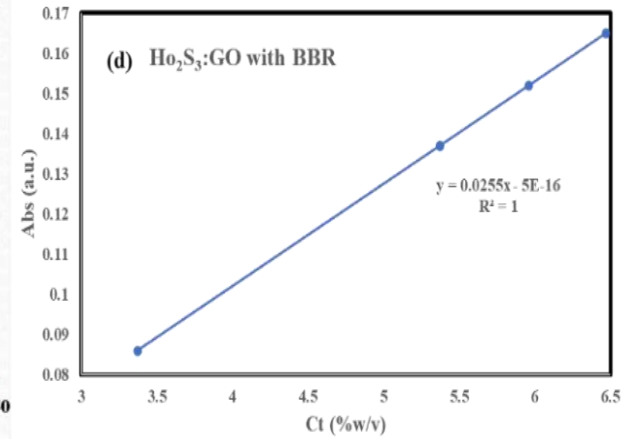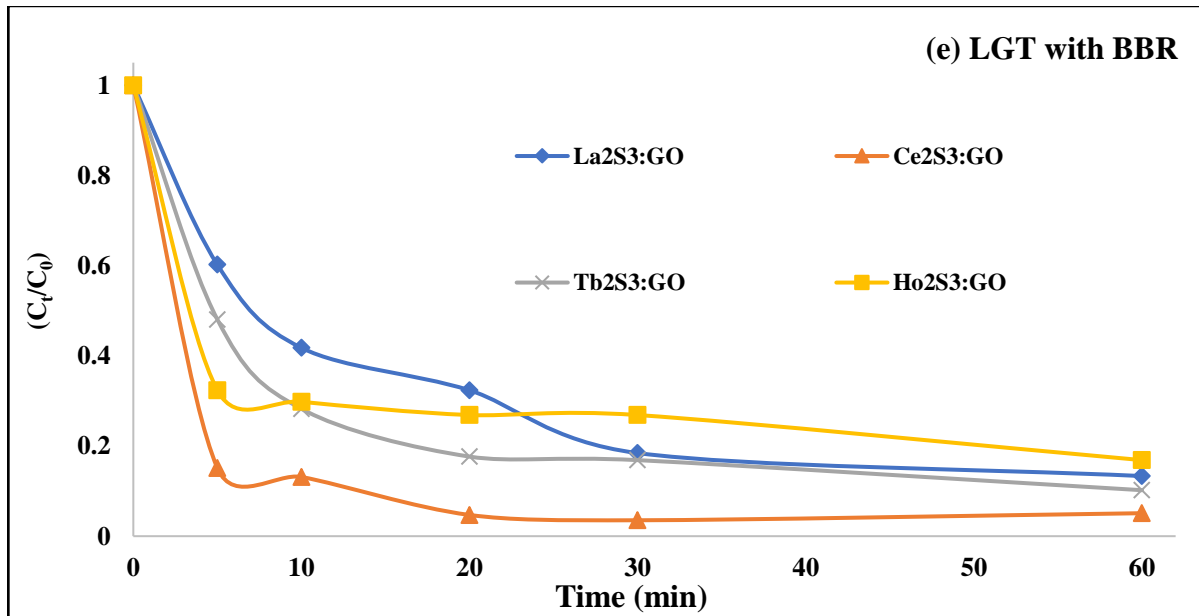

Figs. (SI-1.8). Reduction of BBR dye by LGT under SCR and with function of time.

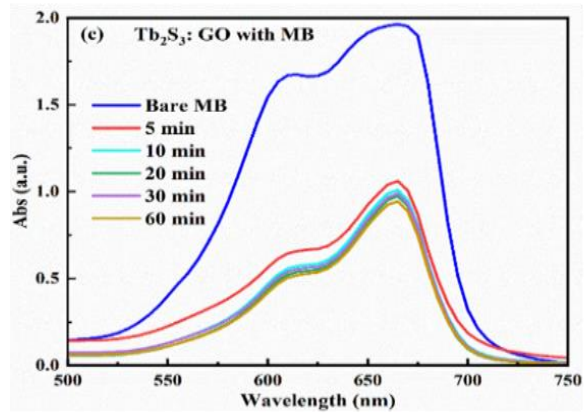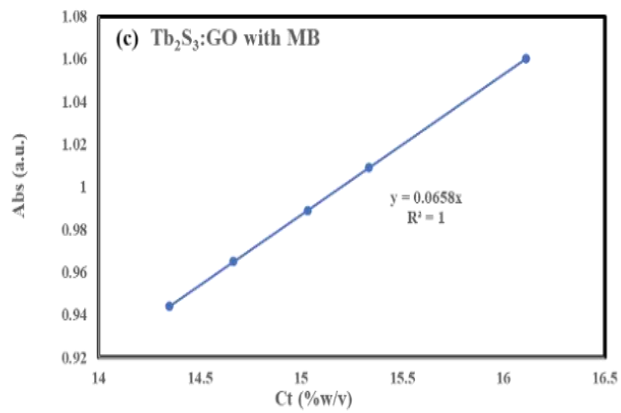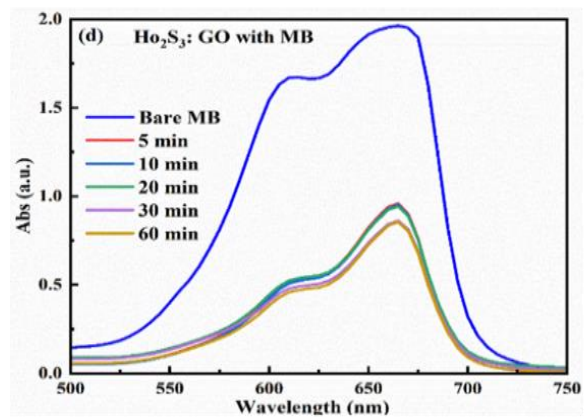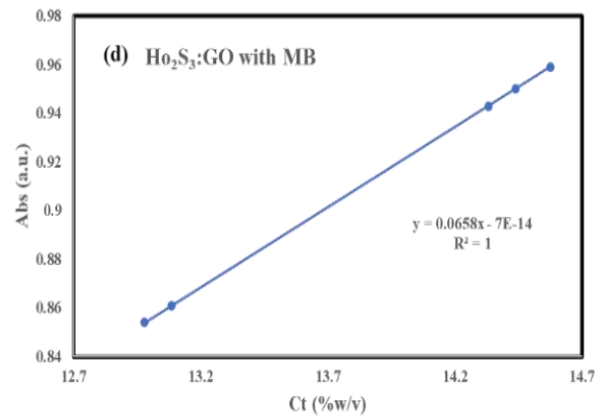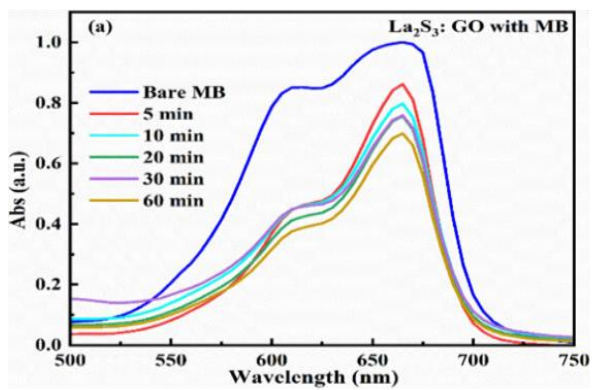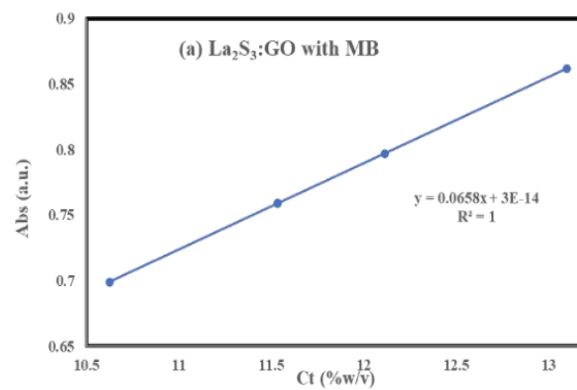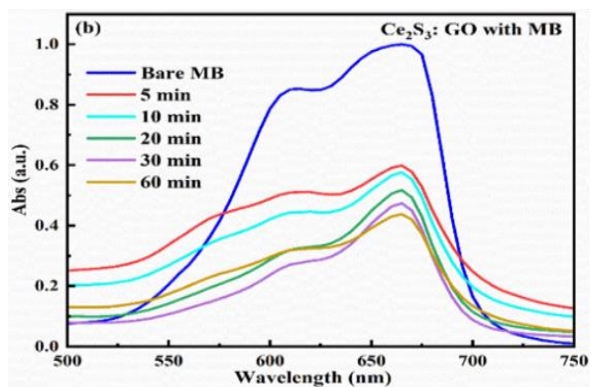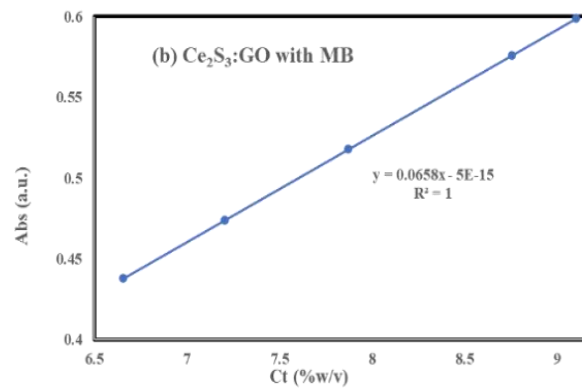

Figs. (SI-1.9). Reduction of MB dye by LGT under SCR and with 1<sup>st</sup> order kinetics.



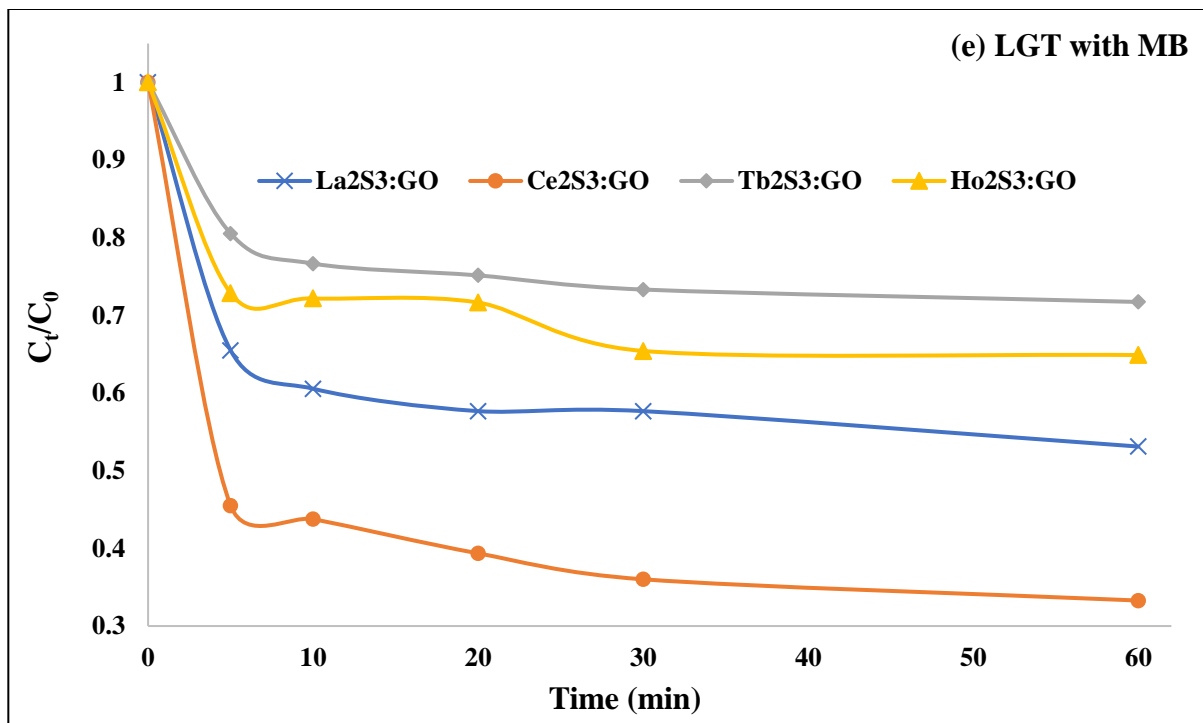

Fig. (SI-2.0). Sonocatalytic reduction activities with MB as a function of time.

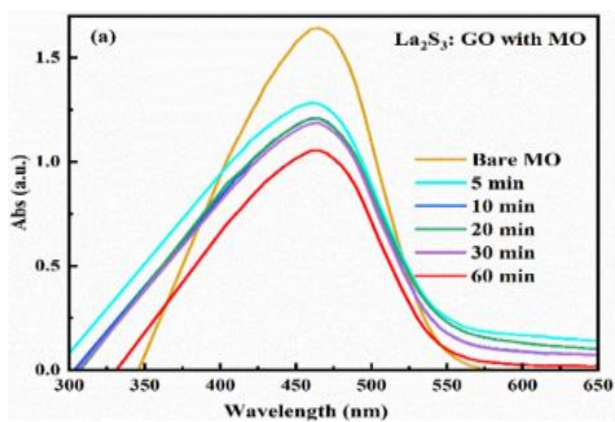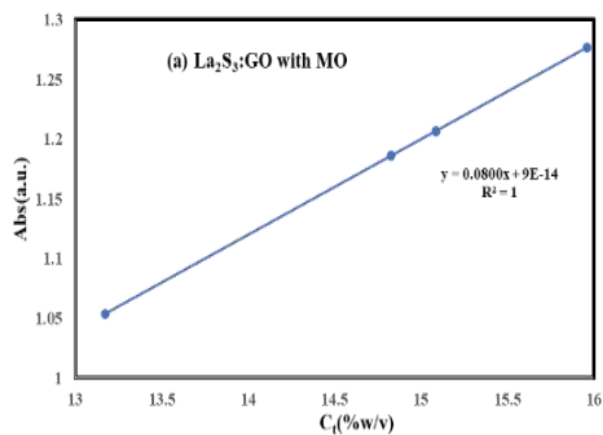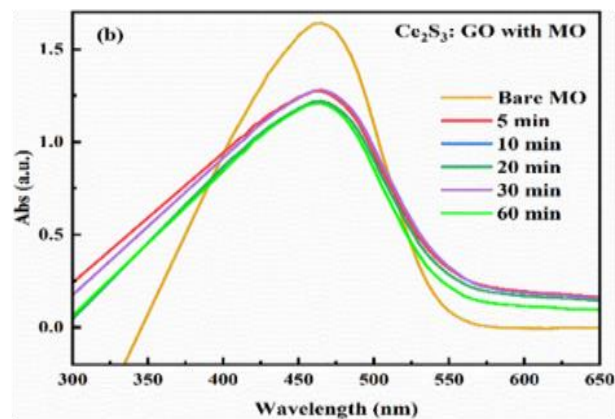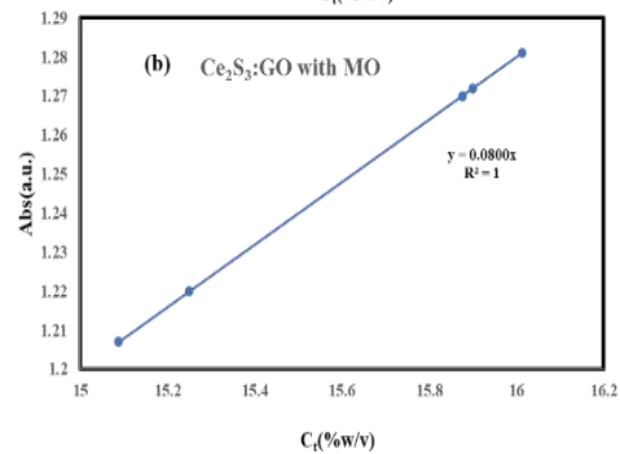

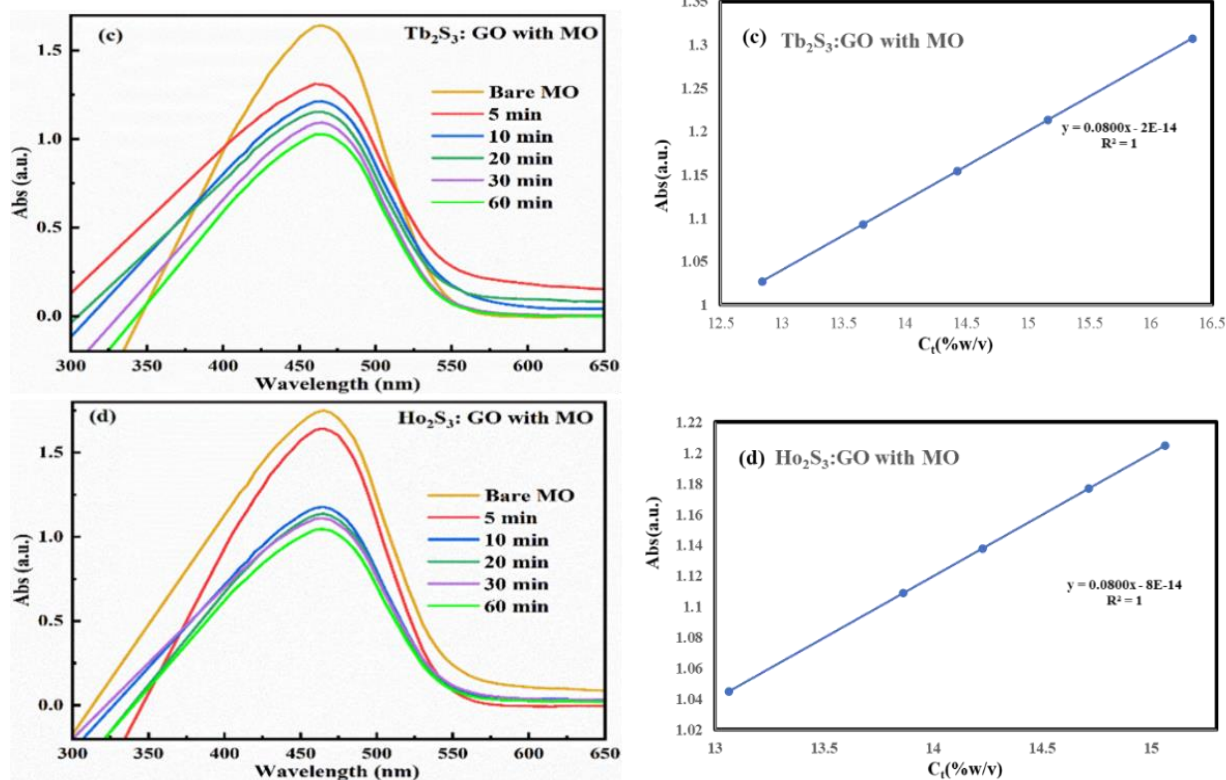

Figs. (SI-2.1). Degradation of MO dye LGT under SCR and with 1<sup>st</sup> order kinetics.

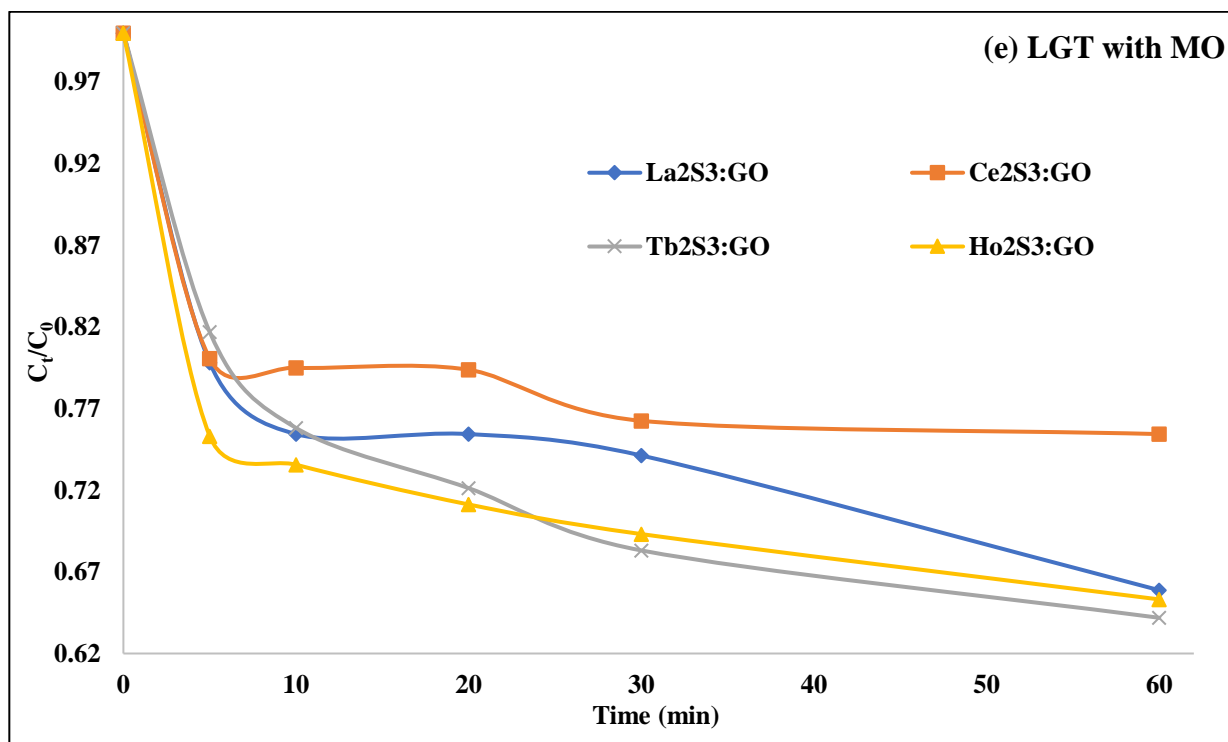

Fig. 2.2. Sonocatalytic reduction activities with MO as a function of time.

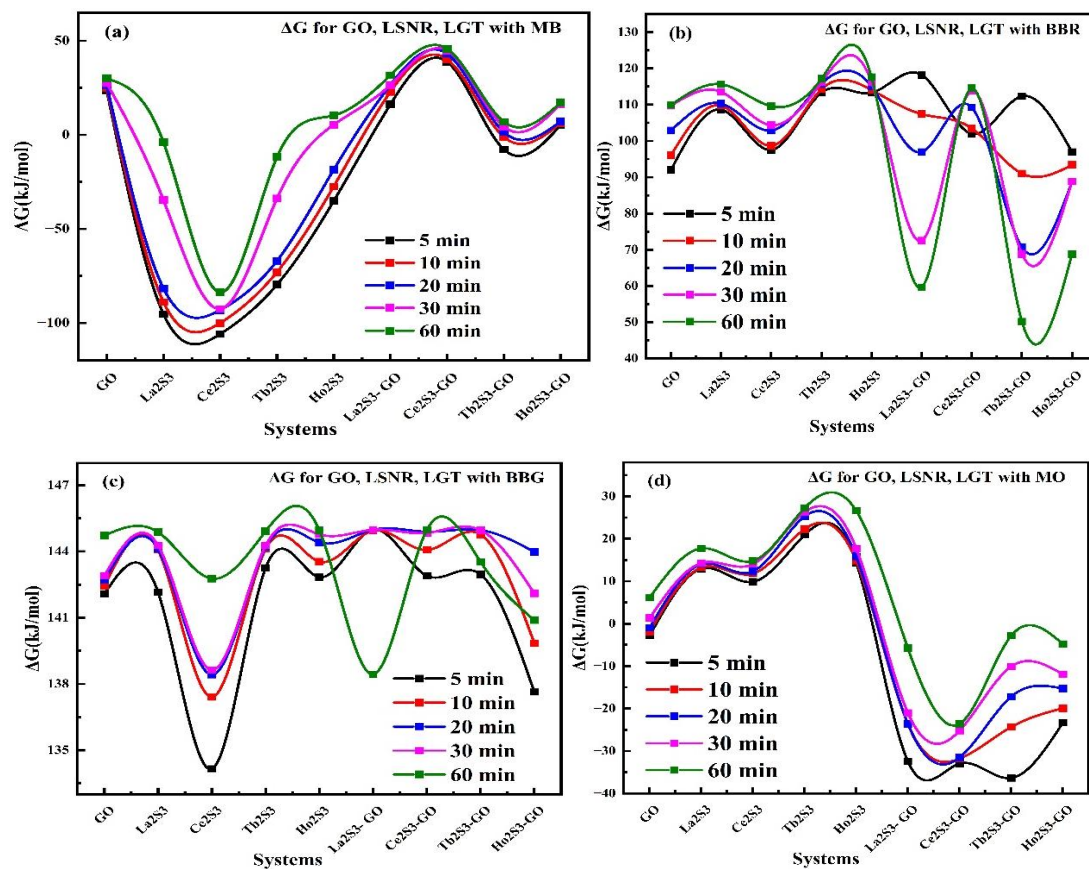

Figs. (SI-2.3). The time dependent,  $\Delta G$  for GO, LSNR and LGT with (a) BBR (b) BBG (c) MO.

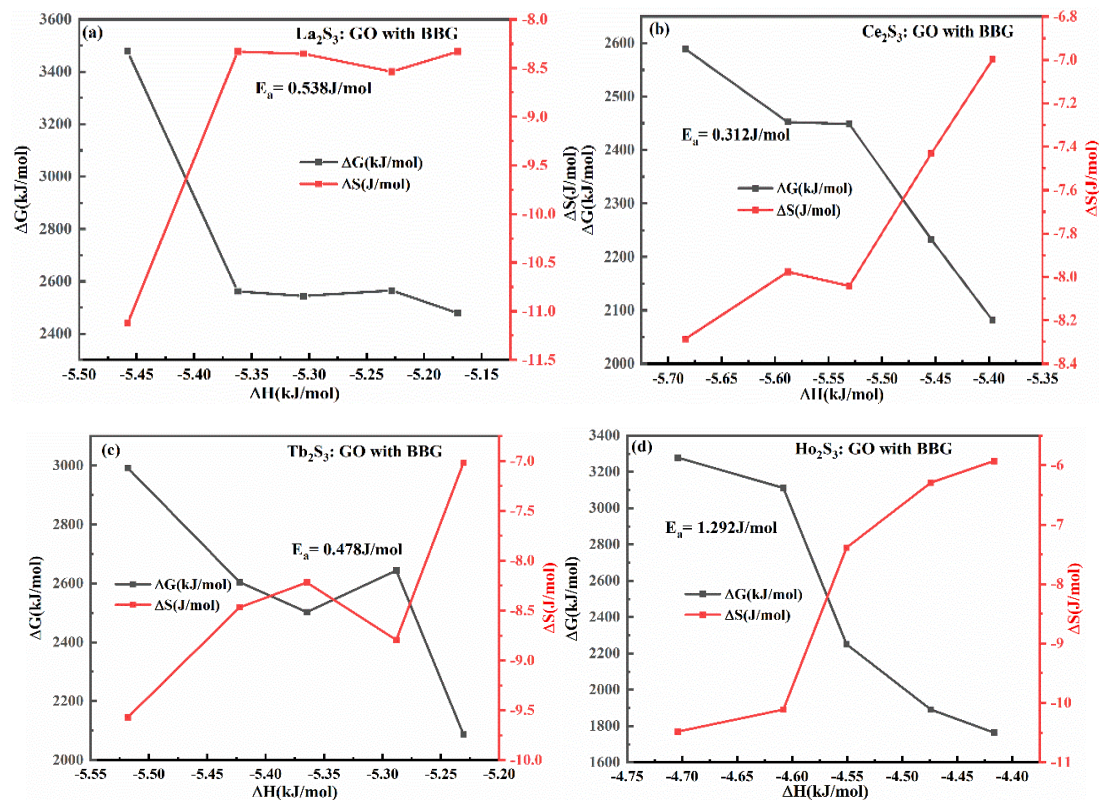

Figs. (SI-2.4). The relation between Gibbs free energy, enthalpy, and entropy of BBG with LSNR.



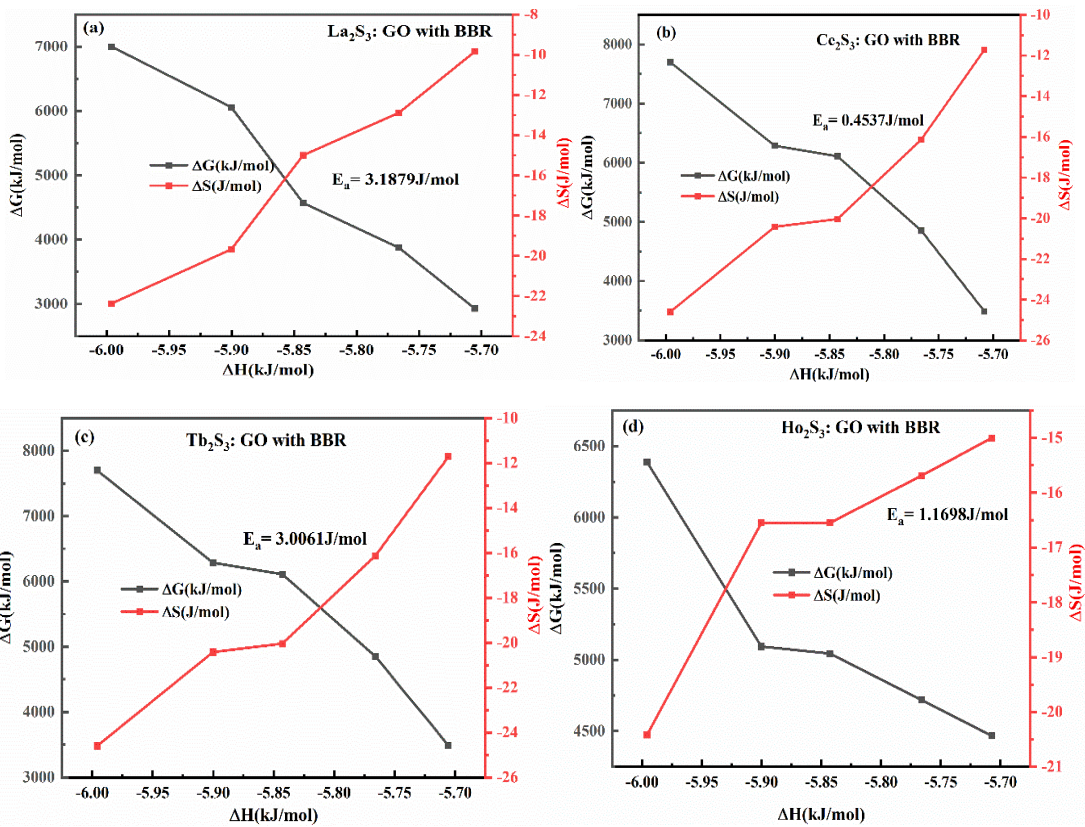

**Figs. (SI-2.5).** The relation between Gibbs free energy, enthalpy, and entropy of BBR with LSNR.

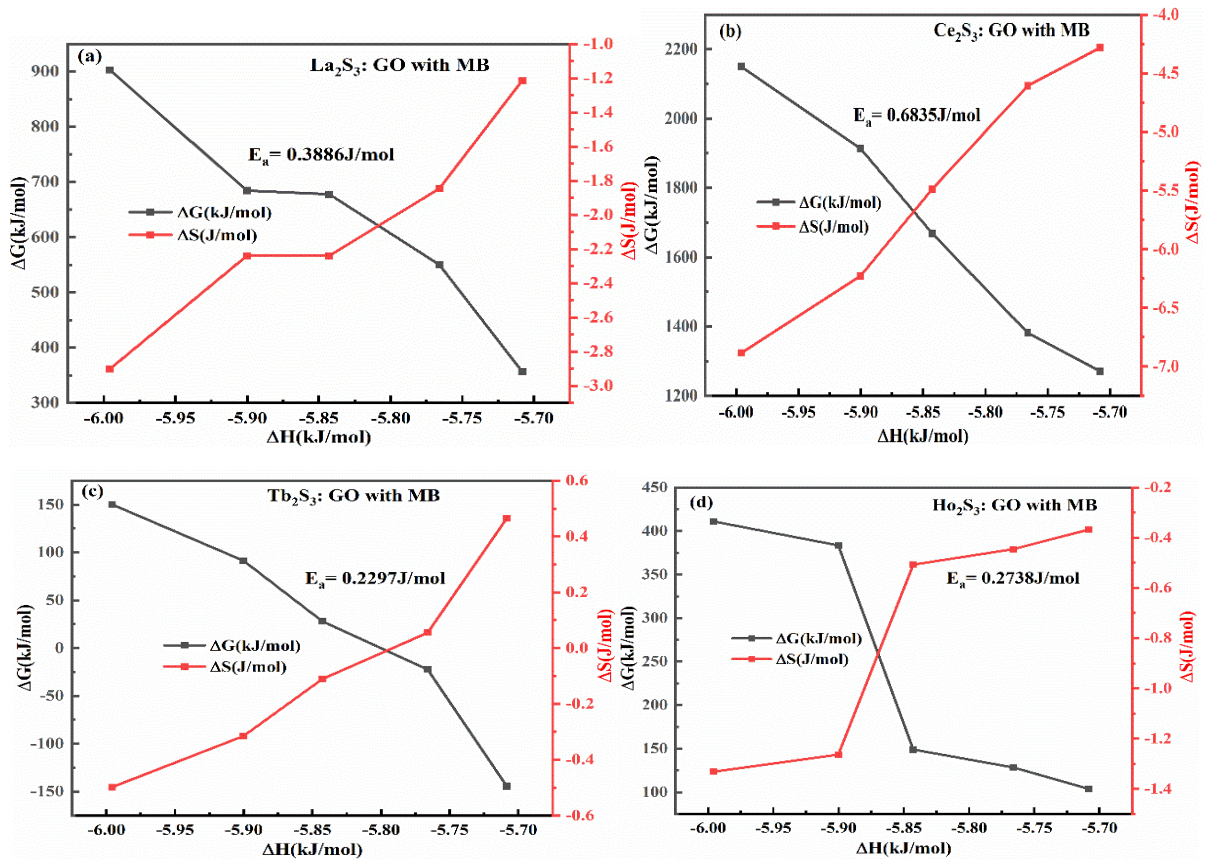

**Figs. (SI-2.6).** The relation between Gibbs free energy, enthalpy, and entropy of MB with LSNR.

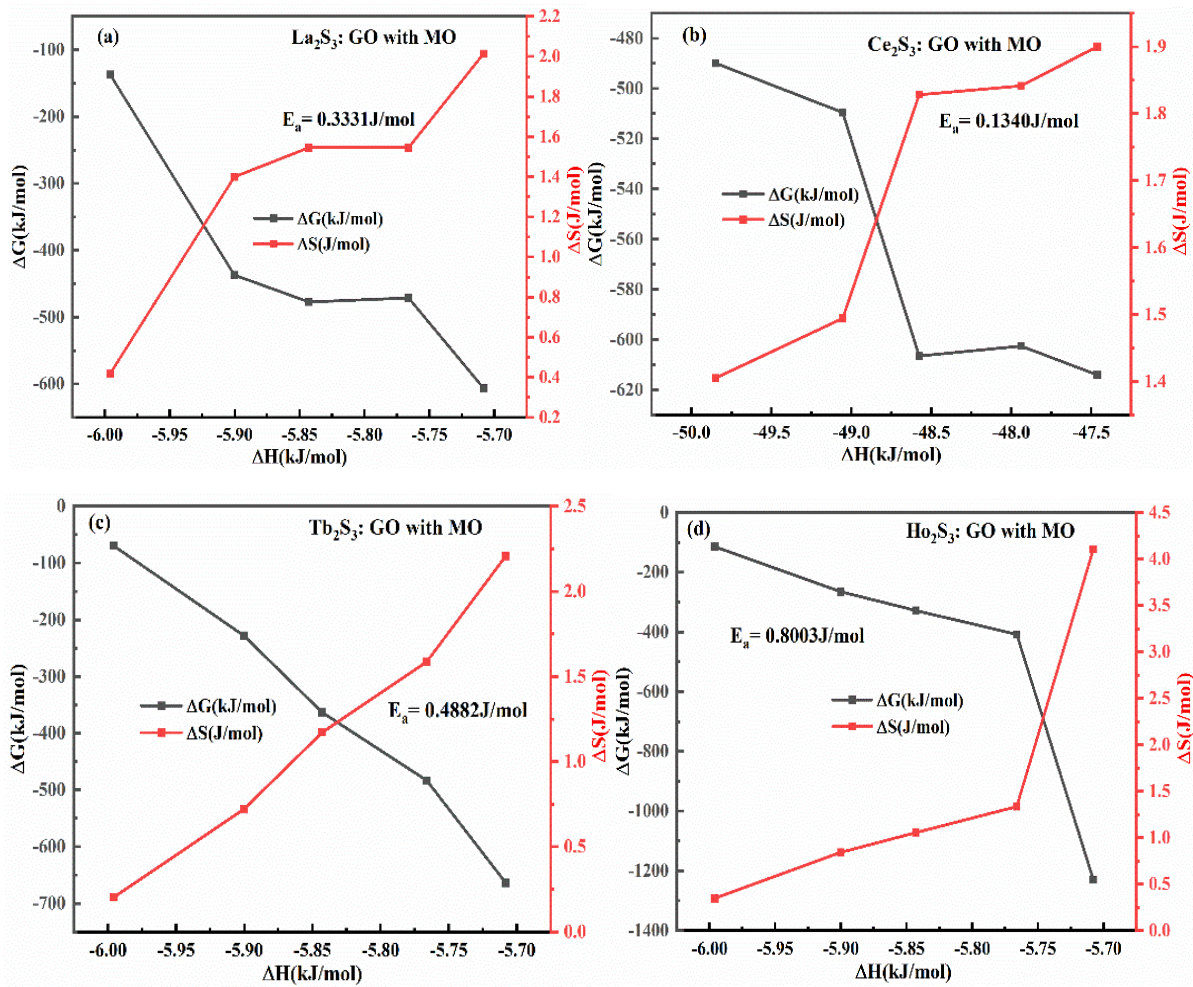

**Figs. (SI-2.7).** The relation between Gibbs free energy, enthalpy, and entropy of MO with LSNR.

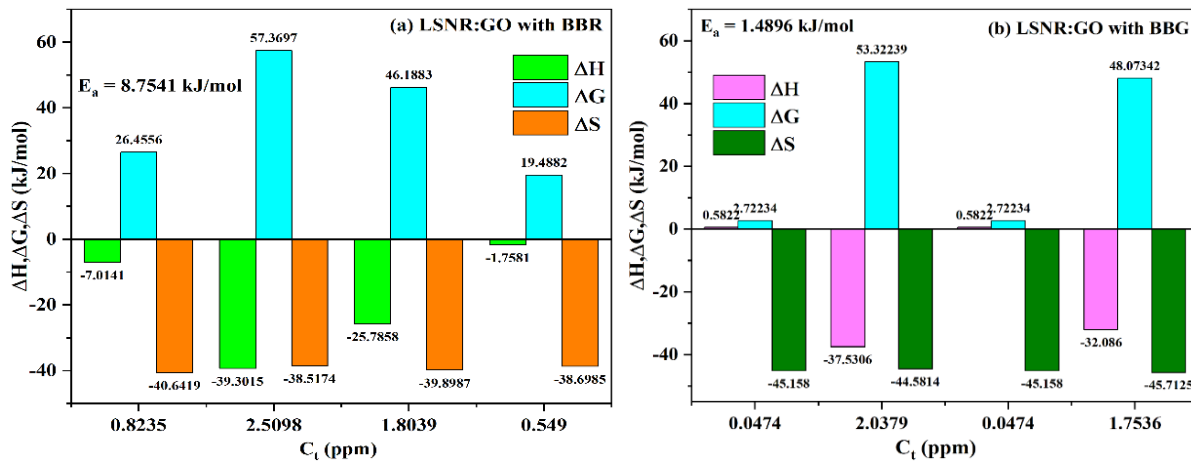

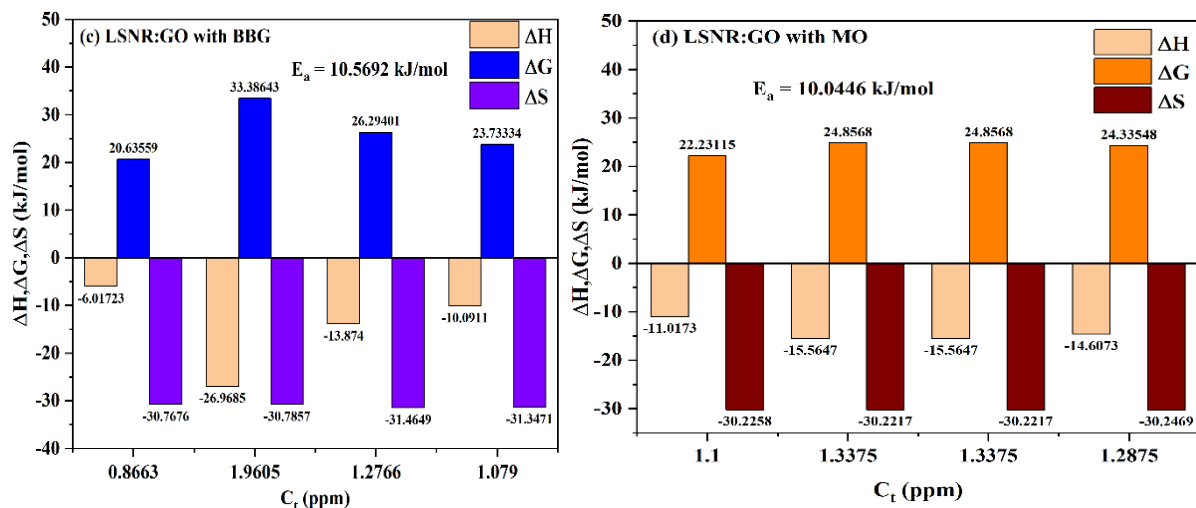

Figs. (SI-2.8). The thermodynamic parameters ( $\Delta H$ ,  $\Delta G$  and  $\Delta S$ ) of aq-LGT with (a) BBR (b) BGG (c) MB (d) MO under PCR process.

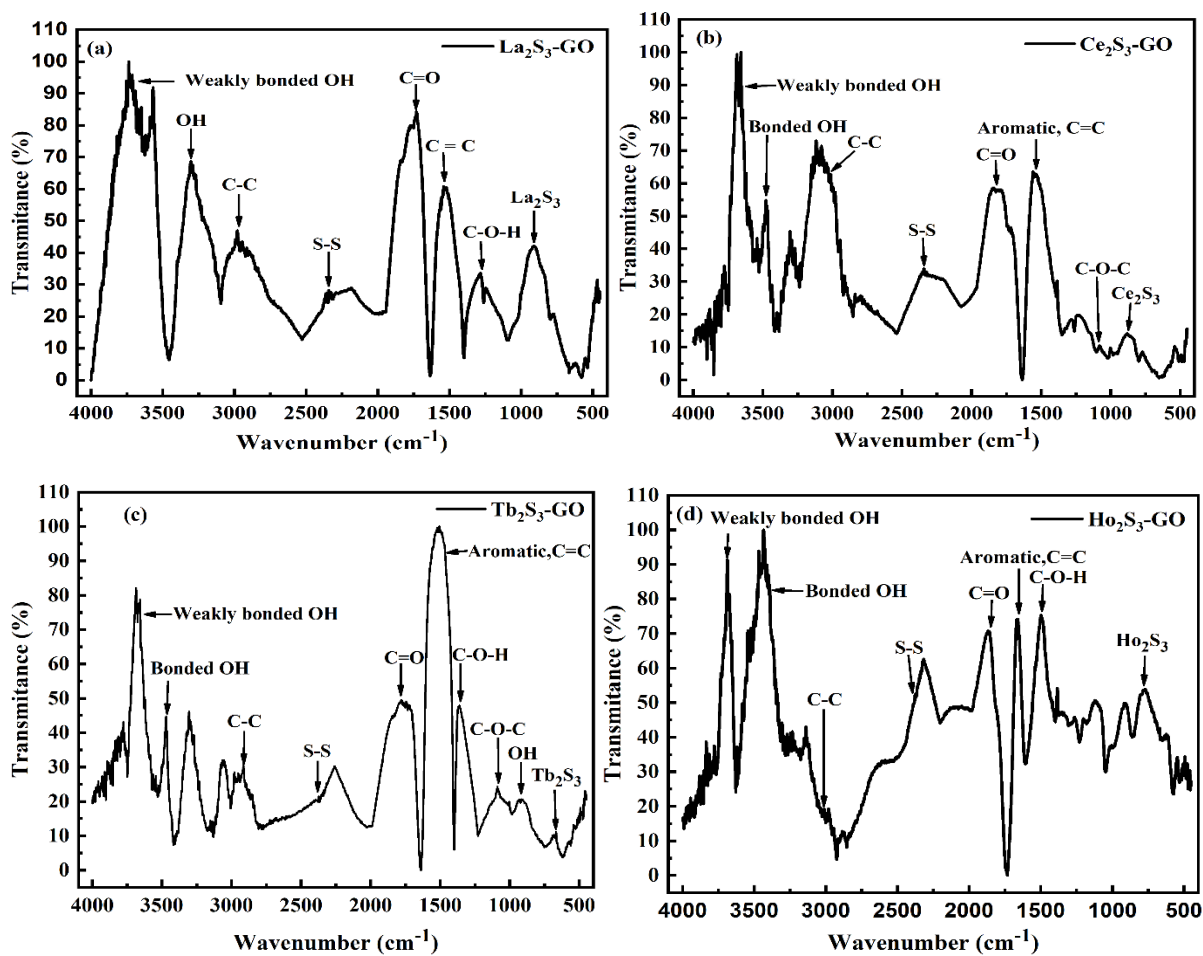

Figs. (SI-2.9). FT-IR analysis of LSNR:GO.

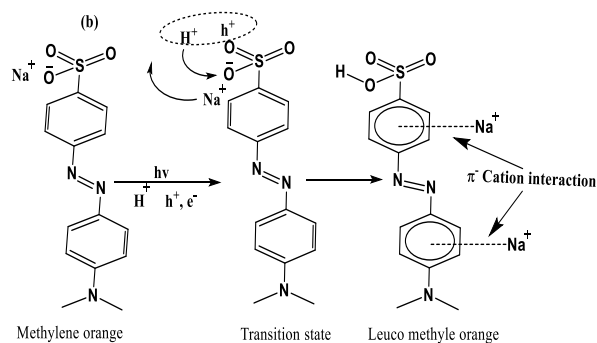



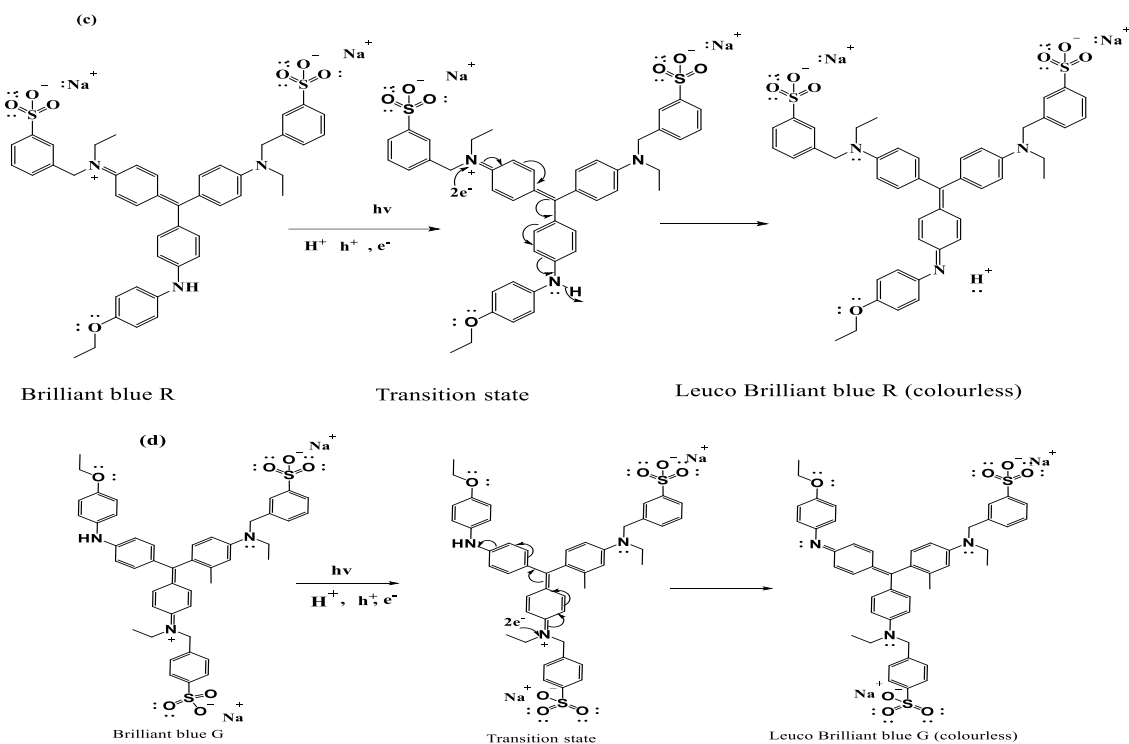

Figs. (SI-3.0). PCR and SCR mechanism of (b) MO (c) BBR (d) BBG by LGT.

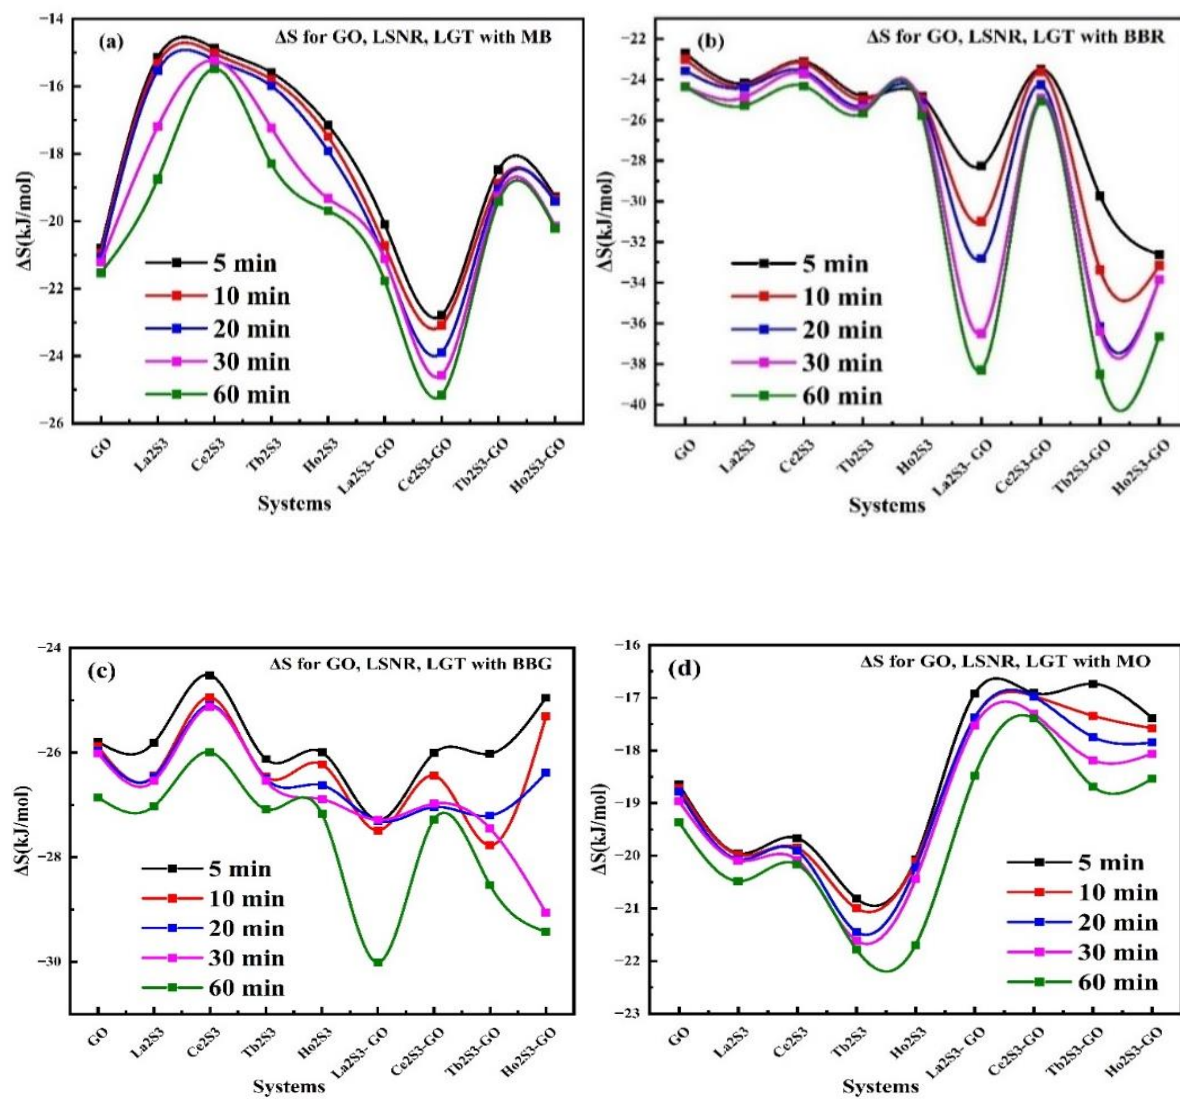

Figs. (SI-3.1). Time dependent,  $\Delta S$  for GO, LSNR and LGT with (a) BBR (b) BBG (c) MO.

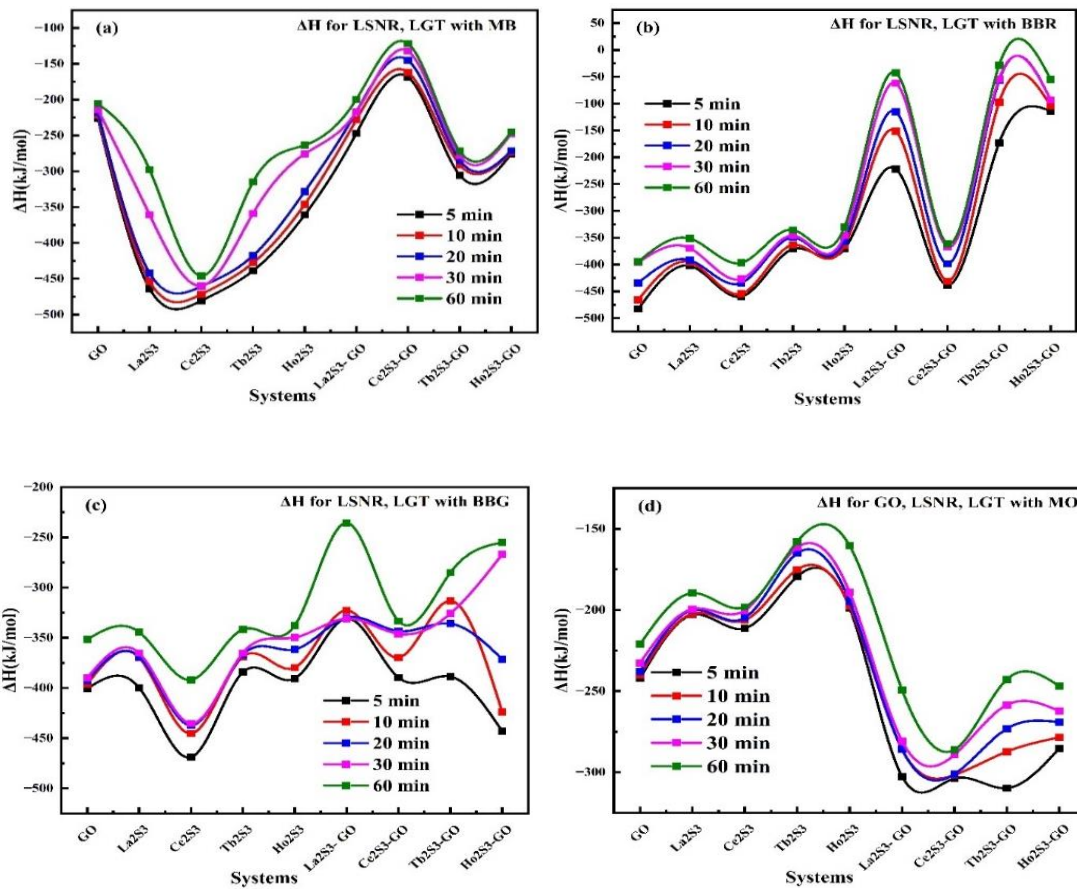

Figs. (SI-3.2). Time dependent  $\Delta H$  for GO, LSNR and LGT under SCR.

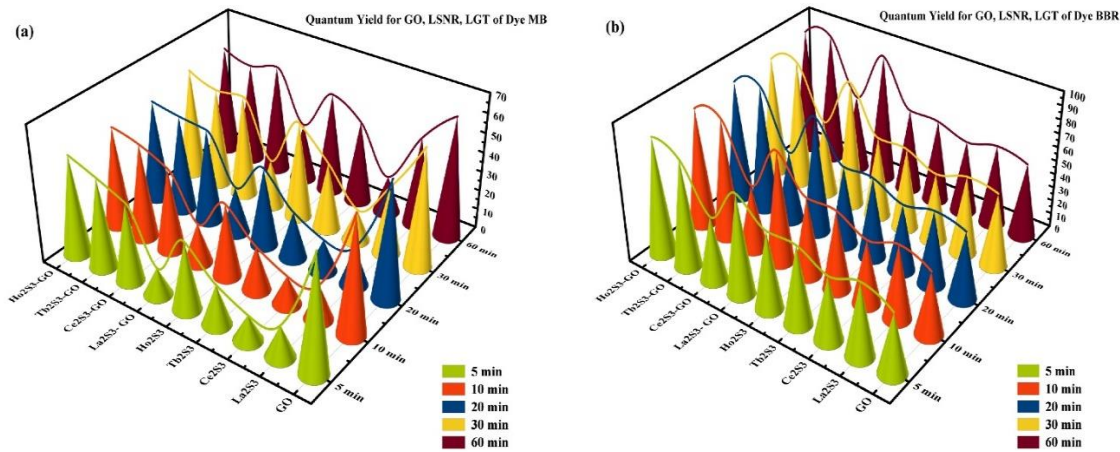

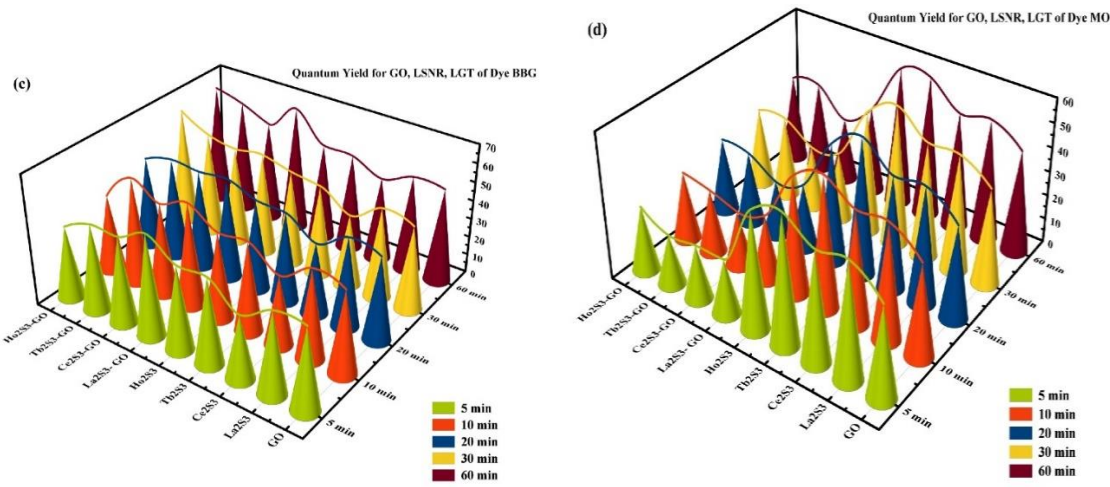

Figs. (SI-3.3). The  $\Phi$  (%) of MB, BBR, BBG and MO under SCR with the @time.

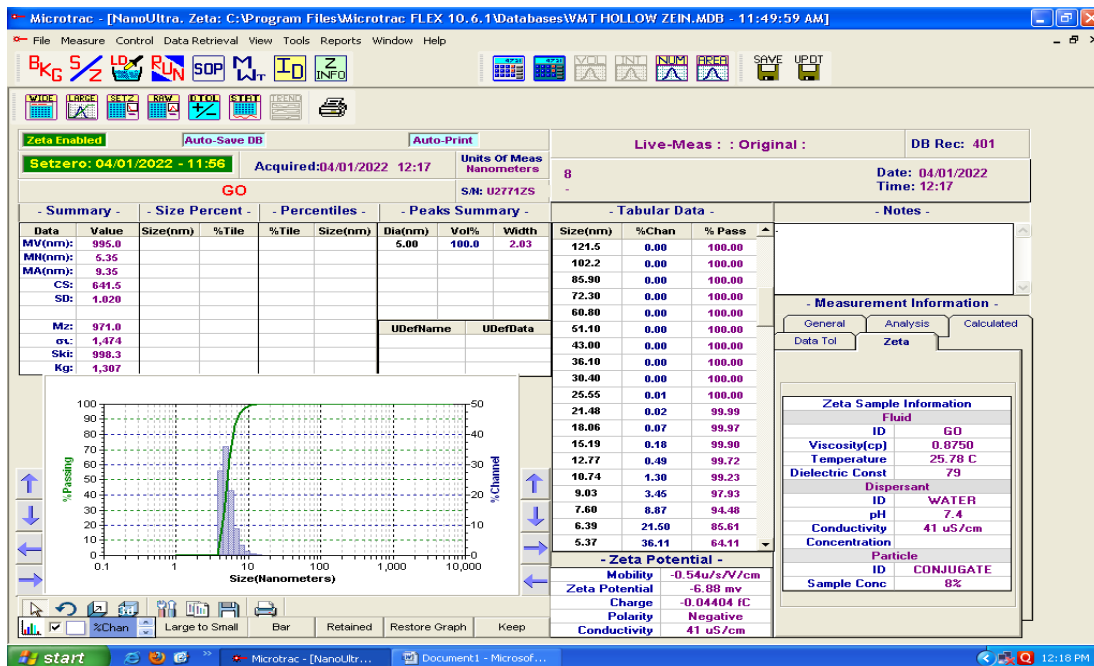





10

Data Acquired: 04/01/2022 - 13:38  
Calculated: 04/01/2022 - 13:38

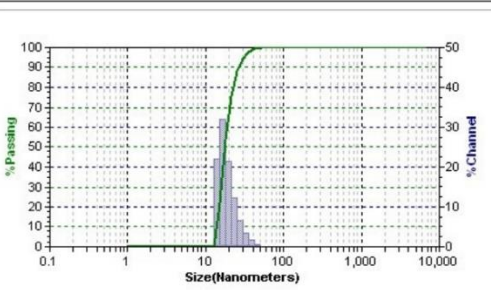

| Summary |       | Percentiles |          | Size Percent |       |
|---------|-------|-------------|----------|--------------|-------|
| Data    | Value | %Tile       | Size(nm) | Size (nm)    | %Tile |
| MV(nm)  | 2.058 |             |          |              |       |
| MN(nm)  | 19.70 |             |          |              |       |
| MA(nm)  | 647.0 |             |          |              |       |
| CS      | 9.27  |             |          |              |       |
| SD      | 4.64  |             |          |              |       |
| PDI     | 1.002 |             |          |              |       |
| Mz      | 1,985 |             |          |              |       |
| wt      | 1,141 |             |          |              |       |
| SkI     | 313.9 |             |          |              |       |
| Kg      | 1,249 |             |          |              |       |

| Size(nm) | %Chan | % Pass | Size(nm) | %Chan | % Pass |
|----------|-------|--------|----------|-------|--------|
| 6540     | 0.00  | 100.00 | 18.06    | 32.08 | 54.00  |
| 5500     | 0.00  | 100.00 | 15.19    | 21.92 | 21.92  |
| 4620     | 0.00  | 100.00 | 12.77    | 0.00  | 0.00   |
| 3890     | 0.00  | 100.00 | 10.74    | 0.00  | 0.00   |
| 3270     | 0.00  | 100.00 | 9.03     | 0.00  | 0.00   |
| 2750     | 0.00  | 100.00 | 7.60     | 0.00  | 0.00   |
| 2312     | 0.00  | 100.00 | 6.39     | 0.00  | 0.00   |
| 1944     | 0.00  | 100.00 | 5.37     | 0.00  | 0.00   |
| 1635     | 0.00  | 100.00 | 4.52     | 0.00  | 0.00   |
| 1375     | 0.00  | 100.00 | 3.80     | 0.00  | 0.00   |
| 1156     | 0.00  | 100.00 | 3.19     | 0.00  | 0.00   |
| 972.0    | 0.00  | 100.00 | 2.690    | 0.00  | 0.00   |
| 818.0    | 0.00  | 100.00 | 2.260    | 0.00  | 0.00   |
| 667.0    | 0.00  | 100.00 | 1.900    | 0.00  | 0.00   |
| 578.0    | 0.01  | 100.00 | 1.600    | 0.00  | 0.00   |
| 486.0    | 0.01  | 99.99  | 1.340    | 0.00  | 0.00   |
| 409.0    | 0.01  | 99.98  | 1.130    | 0.00  | 0.00   |
| 344.0    | 0.01  | 99.97  | 0.960    | 0.00  | 0.00   |
| 289.0    | 0.01  | 99.96  |          |       |        |
| 243.0    | 0.00  | 99.95  |          |       |        |
| 204.4    | 0.00  | 99.95  |          |       |        |
| 171.9    | 0.00  | 99.95  |          |       |        |
| 144.5    | 0.00  | 99.95  |          |       |        |
| 121.5    | 0.00  | 99.95  |          |       |        |
| 102.2    | 0.00  | 99.95  |          |       |        |
| 85.90    | 0.00  | 99.95  |          |       |        |
| 72.30    | 0.00  | 99.95  |          |       |        |
| 60.80    | 0.00  | 99.95  |          |       |        |
| 51.10    | 0.53  | 99.95  |          |       |        |
| 43.00    | 1.64  | 99.42  |          |       |        |
| 36.10    | 3.39  | 97.78  |          |       |        |
| 30.40    | 6.53  | 94.39  |          |       |        |
| 25.55    | 12.40 | 87.66  |          |       |        |
| 21.48    | 21.46 | 75.46  |          |       |        |

Peaks

| Dia(nm) | Vol%  | Width |
|---------|-------|-------|
| 17.66   | 100.0 | 9.28  |

SOP Name: BSA(\*)

|                    |           |                   |                  |                  |                                                                     |                    |            |
|--------------------|-----------|-------------------|------------------|------------------|---------------------------------------------------------------------|--------------------|------------|
| Distribution:      | Number:   | Run Time:         | 60 Sec           | Fluid:           | CURRENT CARRIER                                                     | Reflected Pw (mv): | 214        |
| Progression:       | Standard: | Run#:             | Avg of 3         | Fluid Ref Index: | 1.333                                                               | Loading Index:     | 0.255      |
| Up Edge(nm):       | 6540      | Particle:         | CURRENT PARTICLE | Above Residual:  | 0                                                                   | Conc. Index:       | 0.00119    |
| Low Edge(nm):      | 0.8       | Transparency:     | Transparent      | Below Residual:  | 0                                                                   | Viscosity(cp):     | 0.8070     |
| Residuals:         | Disabled  | Part. Ref. Index: | 1.59             | RMS Residual:    | 98.943%                                                             | Cell Temp(C):      | 29.45      |
| #Channels:         | 52        | Particle Shape:   | Irregular        | Multi Run Delay: | 0 Min.                                                              | Nanotrac Type:     | Nino, Zeta |
| Analysis:          | UPA       | Density:          | 1.85 g/cc        | Recalc Status:   | Original                                                            | Serial Number:     | U27712S    |
| Filter Resolution: | Std Norm  | DB Record:        | 419              | Database:        | C:\Program Files\Microtrac\FLEX 10.6.1\Databases\VMT HOLLOW ZEN.MDB |                    |            |
| Sensitivity:       | Standard  |                   |                  |                  |                                                                     |                    |            |

**Ce2S3 GO**

10.6.1

04/01/2022 15:17  
DB Rec: 435

Zetatrac  
U27712S

| Summary |        | Size %   |       | Peak Summary |      |        |
|---------|--------|----------|-------|--------------|------|--------|
| Data    | Value  | Size(nm) | %Tile | Size(nm)     | Vol% | Width  |
| MV(nm)  | 819.0  |          |       | 262.7        | 47.2 | 161.18 |
| MN(nm)  | 192.1  |          |       |              |      |        |
| MA(nm)  | 344.0  |          |       |              |      |        |
| CS      | 17.43  |          |       |              |      |        |
| SD      | 101.4  |          |       |              |      |        |
| PDI     | 0.1754 |          |       |              |      |        |
| Mz      | 489.2  |          |       |              |      |        |
| wt      | 727.5  |          |       |              |      |        |
| SkI     | 760.8  |          |       |              |      |        |
| Kg      | 8.456  |          |       |              |      |        |

Warnings: NONE

SOP Name: BSA(\*)

|                    |           |                   |                  |                  |                                                                     |                    |            |
|--------------------|-----------|-------------------|------------------|------------------|---------------------------------------------------------------------|--------------------|------------|
| Distribution:      | Number:   | Run Time:         | 60 Sec           | Fluid:           | CURRENT CARRIER                                                     | Reflected Pw (mv): | 164        |
| Progression:       | Standard: | Run#:             | Avg of 3         | Fluid Ref Index: | 1.333                                                               | Loading Index:     | 0.255      |
| Up Edge(nm):       | 6540      | Particle:         | CURRENT PARTICLE | Above Residual:  | 0                                                                   | Conc. Index:       | 0.00064    |
| Low Edge(nm):      | 0.8       | Transparency:     | Transparent      | Below Residual:  | 0                                                                   | Viscosity(cp):     | 0.7650     |
| Residuals:         | Disabled  | Part. Ref. Index: | 1.59             | RMS Residual:    | 98.943%                                                             | Cell Temp(C):      | 29.45      |
| #Channels:         | 52        | Particle Shape:   | Irregular        | Multi Run Delay: | 0 Min.                                                              | Nanotrac Type:     | Nino, Zeta |
| Analysis:          | UPA       | Density:          | 1.85 g/cc        | Recalc Status:   | Original                                                            | Serial Number:     | U27712S    |
| Filter Resolution: | Std Norm  | DB Record:        | 419              | Database:        | C:\Program Files\Microtrac\FLEX 10.6.1\Databases\VMT HOLLOW ZEN.MDB |                    |            |
| Sensitivity:       | Standard  |                   |                  |                  |                                                                     |                    |            |

| Size(nm) | %Chan | % Pass | Size(nm) | %Chan | % Pass |
|----------|-------|--------|----------|-------|--------|
| 6540     | 0.00  | 100.00 | 18.06    | 0.00  | 0.00   |
| 5500     | 0.00  | 100.00 | 15.19    | 0.00  | 0.00   |
| 4620     | 0.00  | 100.00 | 12.77    | 0.00  | 0.00   |
| 3890     | 0.00  | 100.00 | 10.74    | 0.00  | 0.00   |
| 3270     | 0.00  | 100.00 | 9.03     | 0.00  | 0.00   |
| 2750     | 0.00  | 100.00 | 7.60     | 0.00  | 0.00   |
| 2312     | 0.00  | 100.00 | 6.39     | 0.00  | 0.00   |
| 1944     | 0.00  | 100.00 | 5.37     | 0.00  | 0.00   |
| 1635     | 0.00  | 100.00 | 4.52     | 0.00  | 0.00   |
| 1375     | 0.01  | 100.00 | 3.80     | 0.00  | 0.00   |
| 1156     | 0.02  | 99.99  | 3.19     | 0.00  | 0.00   |
| 972.0    | 0.04  | 99.97  | 2.690    | 0.00  | 0.00   |
| 818.0    | 0.05  | 99.93  | 2.260    | 0.00  | 0.00   |
| 667.0    | 0.10  | 99.88  | 1.900    | 0.00  | 0.00   |
| 578.0    | 0.47  | 99.78  | 1.600    | 0.00  | 0.00   |
| 486.0    | 2.29  | 99.21  | 1.340    | 0.00  | 0.00   |
| 409.0    | 6.30  | 97.11  | 1.130    | 0.00  | 0.00   |
| 344.0    | 9.34  | 90.81  | 0.950    | 0.00  | 0.00   |
| 289.0    | 9.94  | 81.47  |          |       |        |
| 243.0    | 9.46  | 71.93  |          |       |        |
| 204.4    | 7.76  | 62.47  |          |       |        |
| 171.9    | 7.96  | 54.71  |          |       |        |
| 144.5    | 10.87 | 46.75  |          |       |        |
| 121.5    | 16.64 | 35.88  |          |       |        |
| 102.2    | 19.24 | 19.24  |          |       |        |
| 85.90    | 0.00  | 0.00   |          |       |        |
| 72.30    | 0.00  | 0.00   |          |       |        |
| 60.80    | 0.00  | 0.00   |          |       |        |
| 51.10    | 0.00  | 0.00   |          |       |        |
| 43.00    | 0.00  | 0.00   |          |       |        |
| 36.10    | 0.00  | 0.00   |          |       |        |
| 30.40    | 0.00  | 0.00   |          |       |        |
| 25.55    | 0.00  | 0.00   |          |       |        |
| 21.48    | 0.00  | 0.00   |          |       |        |





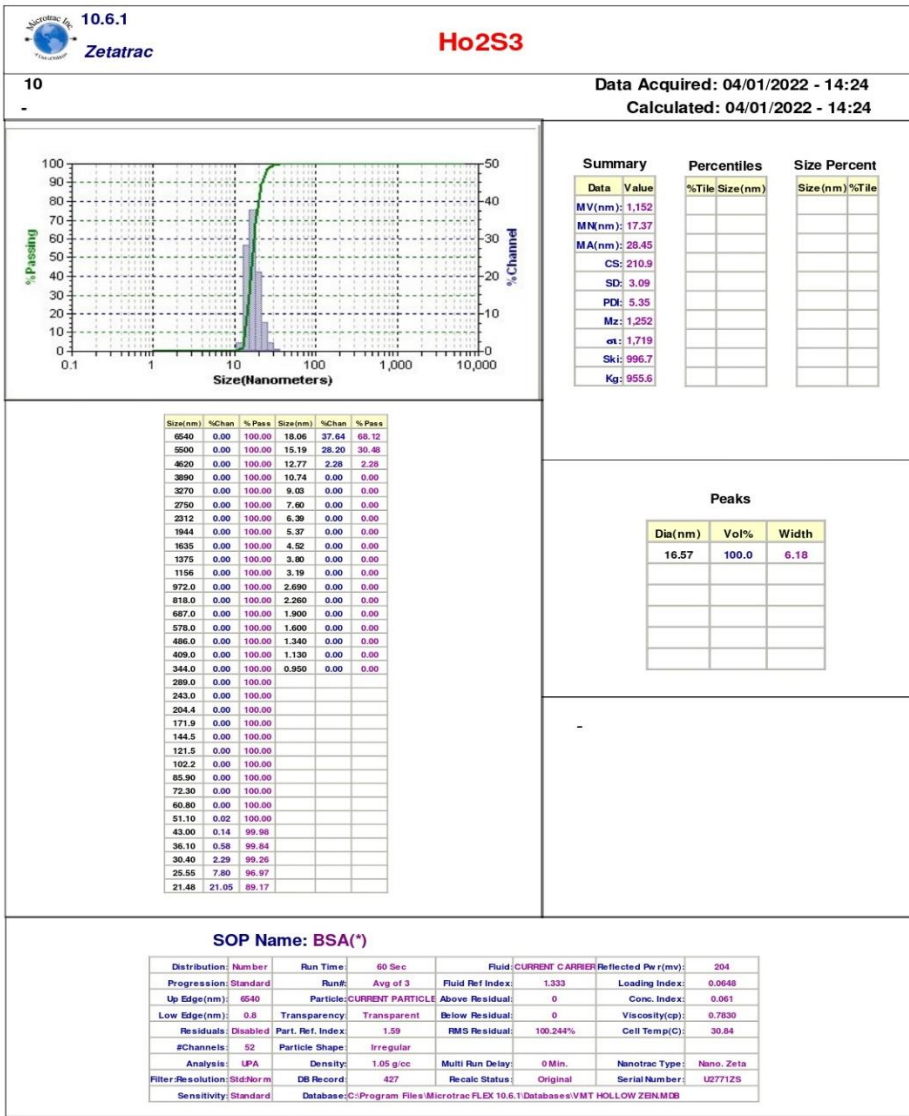

| Peaks  |       |       |
|--------|-------|-------|
| Di(nm) | Vol%  | Width |
| 16.57  | 100.0 | 6.18  |

**SOP Name: BSA(\*)**

|                   |          |                  |                                                                     |                 |                 |                   |           |
|-------------------|----------|------------------|---------------------------------------------------------------------|-----------------|-----------------|-------------------|-----------|
| Distribution      | Number   | Run Time         | 60 Sec                                                              | Fluid           | CURRENT CARRIER | Reflected Per(mv) | 204       |
| Progression       | Standard | Rank             | Avg of 3                                                            | Fluid Ref Index | 1.333           | Loading Index     | 0.0648    |
| Up Edge(nm)       | 6540     | Particle         | CURRENT PARTICLE                                                    | Above Residual  | 0               | Conc. Index       | 0.061     |
| Low Edge(nm)      | 0.8      | Transparency     | Transparent                                                         | Below Residual  | 0               | Viscosity(cp)     | 0.7630    |
| Residuals         | Disabled | Part. Ref. Index | 1.59                                                                | RMS Residual    | 100.244%        | Cell Temp(C)      | 30.84     |
| #Channels         | 52       | Particle Shape   | Irregular                                                           |                 |                 |                   |           |
| Analysis          | LPA      | Density          | 1.05 g/cc                                                           | Multi Run Delay | 0 Min.          | Nanotrac Type     | Nano Zeta |
| Filter Resolution | Std Norm | DB Record        | 427                                                                 | Recalc Status   | Original        | Serial Number     | U277125   |
| Sensitivity       | Standard | Database         | C:\Program Files\Microtrac FLEX 10.6.1\Databases\VMT HOLLOW ZEN.MDB |                 |                 |                   |           |

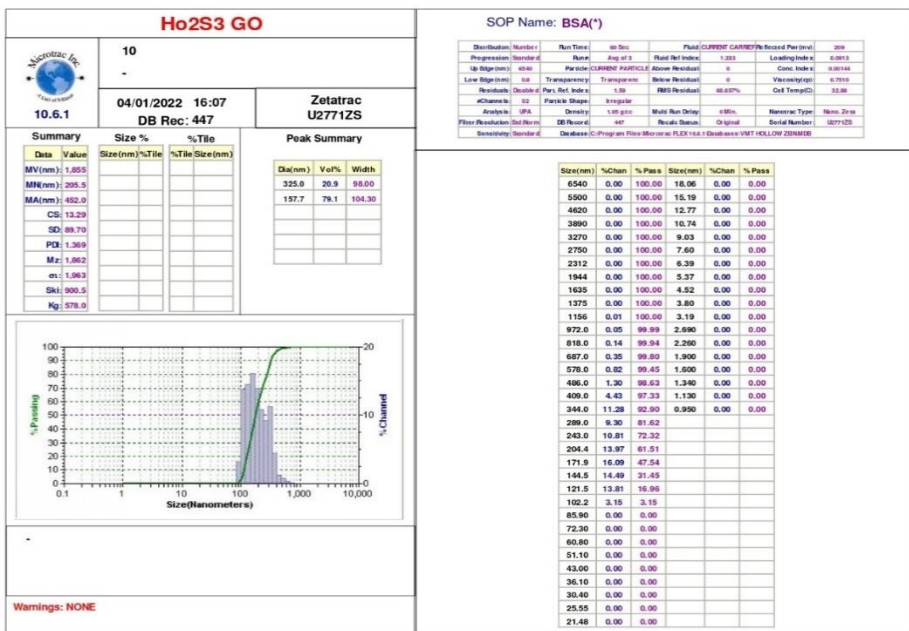

Figs. (SI-3.4). The detailed analysis of DLS GO, LSNR, and LGT.

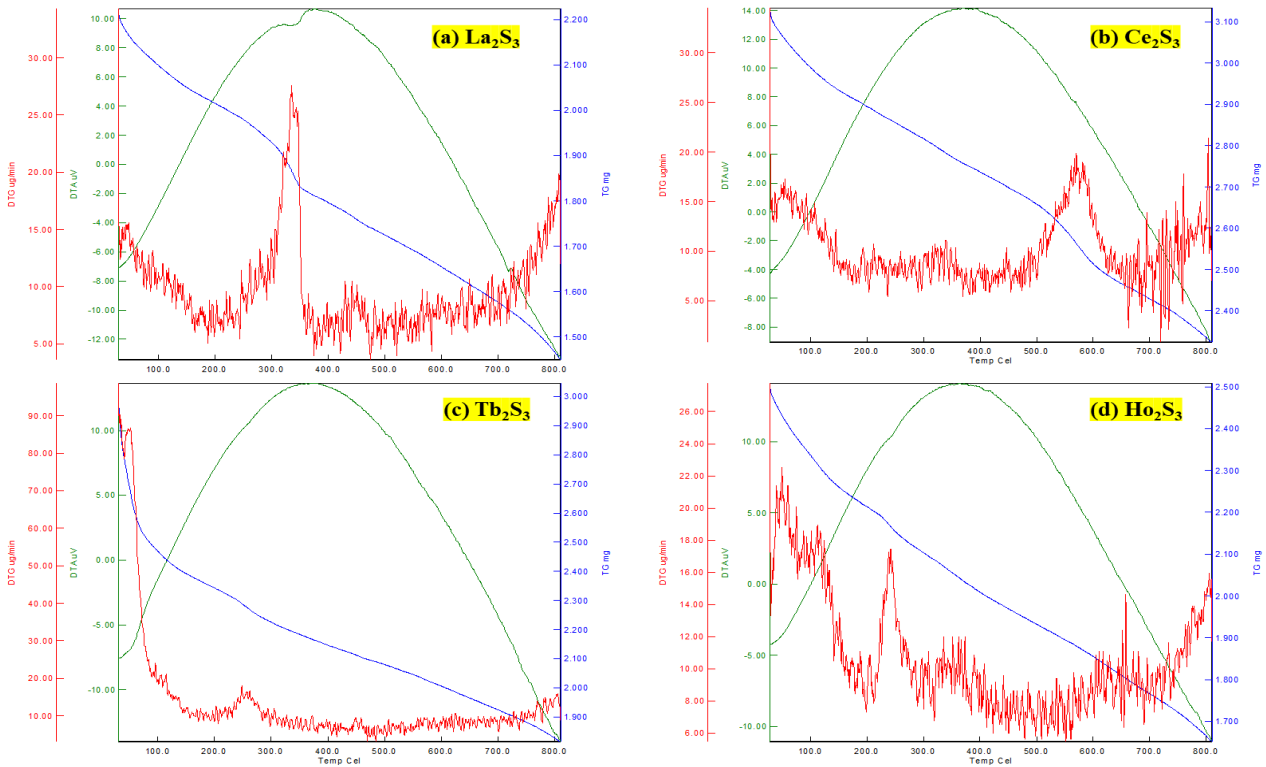

Figs. (SI-3.5). Differential thermal analysis of LSNR.

## 2. Tables

### Primary parameters for PCPs

Table (SI-1.1). The pendant drop, number (PDN) values of LSNR and LGT.

| Temp.(K) | $La_2S_3$ | $Ce_2S_3$ | $Tb_2S_3$ | $Ho_2S_3$ | $La_2S_3:GO$ | $Ce_2S_3:GO$ | $Tb_2S_3:GO$ | $Ho_2S_3:GO$ |
|----------|-----------|-----------|-----------|-----------|--------------|--------------|--------------|--------------|
| 283.15   | 145       | 150       | 145       | 146       | 145          | 149          | 147          | 142          |
| 288.15   | 132       | 136       | 134       | 134       | 135          | 137          | 136          | 134          |
| 298.15   | 127       | 126       | 126       | 125       | 126          | 126          | 126          | 126          |
| 310.15   | 158       | 145       | 142       | 139       | 134          | 137          | 134          | 132          |
| 315.15   | 183       | 163       | 157       | 153       | 143          | 150          | 144          | 140          |

Table (SI-1.2). The viscous flow time (VFT) values of LSNR and LGT.

| Temp.(K) | $La_2S_3$ | $Ce_2S_3$ | $Tb_2S_3$ | $Ho_2S_3$ | $La_2S_3:GO$ | $Ce_2S_3:GO$ | $Tb_2S_3:GO$ | $Ho_2S_3:GO$ |
|----------|-----------|-----------|-----------|-----------|--------------|--------------|--------------|--------------|
| 283.15   | 370       | 328       | 318       | 311       | 326          | 317          | 314          | 339          |
| 288.15   | 306       | 285       | 280       | 278       | 284          | 280          | 283          | 283          |
| 298.15   | 222       | 223       | 224       | 227       | 224          | 224          | 232          | 210          |
| 310.15   | 195       | 192       | 192       | 191       | 194          | 190          | 192          | 191          |
| 315.15   | 207       | 193       | 190       | 184       | 195          | 187          | 182          | 205          |

Unit: (Sec)

Table (SI-1.3). The sound velocity of LSNR and LGT.

| Temp.(K) | $La_2S_3$ | $Ce_2S_3$ | $Tb_2S_3$ | $Ho_2S_3$ | $La_2S_3:GO$ | $Ce_2S_3:GO$ | $Tb_2S_3:GO$ | $Ho_2S_3:GO$ |
|----------|-----------|-----------|-----------|-----------|--------------|--------------|--------------|--------------|
| 283.15   | 1448.75   | 1449.48   | 1449.80   | 1449.41   | 1449.46      | 1449.03      | 1449.17      | 1448.69      |
| 288.15   | 1466.56   | 1466.93   | 1467.12   | 1467.03   | 1466.88      | 1466.68      | 1466.82      | 1466.65      |
| 298.15   | 1496.80   | 1496.77   | 1496.79   | 1497.00   | 1496.95      | 1496.94      | 1496.97      | 1497.08      |
| 310.15   | 1523.65   | 1523.83   | 1523.74   | 1523.69   | 1524.65      | 1524.3       | 1524.15      | 1523.87      |
| 315.15   | 1531.79   | 1532.31   | 1532.12   | 1531.87   | 1533.49      | 1532.86      | 1532.54      | 1531.98      |

Unit: (m/s)

## The thermodynamic parameters calculated by Mansingh survismeter for LSNR

**Table (SI-1.4).**  $\Delta G$ ,  $\Delta H$  and  $\Delta S$  for  $E_a = 1.0971$ /mol of  $\text{La}_2\text{S}_3$ .

| Temp.(K) | $\eta$ , (mPa.S) | $\Delta H$ (kJ/mol) | $\Delta G$ (kJ/mol) | $\Delta S$ (J/mol) |
|----------|------------------|---------------------|---------------------|--------------------|
| 283.15   | 1.0152           | -5.42042            | -35.505             | 0.10625            |
| 288.15   | 1.0475           | -5.51725            | -111.251            | 0.36694            |
| 298.15   | 0.8746           | -5.70872            | 332.078             | -1.13294           |
| 310.15   | 0.7095           | -5.93849            | 885.146             | -2.87308           |
| 315.15   | 0.6379           | -6.03422            | 1178.233            | -3.75779           |

$\eta$ , viscosity (mPa.S)  $\Delta H$ , change in enthalpy (kJ/mol)  $\Delta G$ , change in Gibbs free energy (kJ/mol)  $\Delta S$ , change in entropy (kJ/mol).

**Table (SI-1.5).**  $\Delta G$ ,  $\Delta H$  and  $\Delta S$  for  $E_a = 0.9765$ /mol of  $\text{Ce}_2\text{S}_3$ .

| Temp.(K) | $\eta$ , (mPa.S) | $\Delta H$ (kJ/mol) | $\Delta G$ (kJ/mol) | $\Delta S$ (J/mol) |
|----------|------------------|---------------------|---------------------|--------------------|
| 283.15   | 0.9035           | -0.04408            | -5.42054            | 238.9877           |
| 288.15   | 0.9736           | -0.01161            | -5.51725            | 64.04413           |
| 298.15   | 0.8787           | -0.05615            | -5.70872            | 320.5623           |
| 310.15   | 0.6986           | -0.15578            | -5.93849            | 925.1163           |
| 315.15   | 0.5930           | -0.22694            | -6.03422            | 1369.415           |

**Table (SI-1.6).**  $\Delta G$ ,  $\Delta H$  and  $\Delta S$  for  $E_a = 0.9267$ /mol of  $\text{Tb}_2\text{S}_3$ .

| Temp.(K) | $\eta$ , (mPa.S) | $\Delta H$ (kJ/mol) | $\Delta G$ (kJ/mol) | $\Delta S$ (J/mol) |
|----------|------------------|---------------------|---------------------|--------------------|
| 283.15   | 0.8705           | -0.060218           | -5.420587           | 326.471557         |
| 288.15   | 0.9565           | -0.019307           | -5.517249           | 106.521421         |
| 298.15   | 0.8827           | -0.054193           | -5.708720           | 309.374898         |
| 310.15   | 0.6986           | -0.155791           | -5.938486           | 925.165645         |
| 315.15   | 0.5833           | -0.234097           | -6.034222           | 1412.594320        |

**Table (SI-1.7).**  $\Delta G$ ,  $\Delta H$  and  $\Delta S$  for  $E_a = 0.9420$ /mol of  $\text{Ho}_2\text{S}_3$ .

| Temp.(K) | $\eta$ , (mPa.S) | $\Delta H$ (kJ/mol) | $\Delta G$ (kJ/mol) | $\Delta S$ (J/mol) |
|----------|------------------|---------------------|---------------------|--------------------|
| 283.15   | 0.8514           | -0.069867           | -5.42057            | 378.785678         |
| 288.15   | 0.9497           | -0.022408           | -5.51725            | 123.6283794        |
| 298.15   | 0.8945           | -0.048400           | -5.70872            | 276.3013315        |
| 310.15   | 0.6950           | -0.158038           | -5.93849            | 938.5061109        |
| 315.15   | 0.5650           | -0.247989           | -6.03422            | 1496.421535        |



**Table (SI-1.8).**  $\Delta G$ ,  $\Delta H$  and  $\Delta S$  for  $E_a = 0.9324$  J/mol of  $La_2S_3$ :  $GO$ .

| Temp.(K) | $\eta$ , (mPa.S) | $\Delta H$ (kJ/mol) | $\Delta G$ (kJ/mol) | $\Delta S$ (J/mol) |
|----------|------------------|---------------------|---------------------|--------------------|
| 283.15   | 0.8946           | -5.42058            | 262.364489          | -0.945736          |
| 288.15   | 0.9704           | -5.51725            | 71.907460           | -0.268696          |
| 298.15   | 0.8825           | -5.70872            | 309.767751          | -1.058113          |
| 310.15   | 0.7058           | -5.93849            | 898.556297          | -2.916314          |
| 315.15   | 0.5990           | -6.03422            | 1343.221806         | -4.281314          |

$\eta$ , viscosity (mPa.S)  $\Delta H$ , change in enthalpy (kJ/mol)  $\Delta G$ , change in Gibbs free energy (kJ/mol)  $\Delta S$ , change in entropy (kJ/mol).

**Table (SI-1.9).**  $\Delta G$ ,  $\Delta H$  and  $\Delta S$  for  $E_a = 0.9554$  J/mol of  $Ce_2S_3$ :  $GO$ .

| Temp.(K) | $\eta$ , (mPa.S) | $\Delta H$ (kJ/mol) | $\Delta G$ (kJ/mol) | $\Delta S$ (J/mol) |
|----------|------------------|---------------------|---------------------|--------------------|
| 283.15   | 0.8680           | -5.42056            | 333.4165            | -1.19667           |
| 288.15   | 0.9565           | -5.51725            | 106.4711            | -0.38865           |
| 298.15   | 0.8827           | -5.70872            | 309.4768            | -1.05714           |
| 310.15   | 0.6913           | -5.93849            | 952.1691            | -3.08917           |
| 315.15   | 0.5748           | -6.03422            | 1451.069            | -4.62352           |

**Table (SI-2.0).**  $\Delta G$ ,  $\Delta H$  and  $\Delta S$  for  $E_a = 0.9879$  J/mol of  $Tb_2S_3$ :  $GO$ .

| Temp.(K) | $\eta$ , (mPa.S) | $\Delta H$ (kJ/mol) | $\Delta G$ (kJ/mol) | $\Delta S$ (J/mol) |
|----------|------------------|---------------------|---------------------|--------------------|
| 283.15   | 0.8596           | -5.420525           | 356.276174          | -1.277403          |
| 288.15   | 0.9668           | -5.517249           | 81.018933           | -0.300316          |
| 298.15   | 0.9142           | -5.708720           | 222.426400          | -0.765169          |
| 310.15   | 0.6986           | -5.938486           | 925.160453          | -3.002092          |
| 315.15   | 0.5586           | -6.034222           | 1526.173068         | -4.861835          |

**Table (SI-2.1).**  $\Delta G$ ,  $\Delta H$  and  $\Delta S$  for  $E_a = 0.9190$  J/mol of  $Ho_2S_3$ :  $GO$ .

| Temp.(K) | $\eta$ , (mPa.S) | $\Delta H$ (kJ/mol) | $\Delta G$ (kJ/mol) | $\Delta S$ (J/mol) |
|----------|------------------|---------------------|---------------------|--------------------|
| 283.15   | 0.9281           | -5.42059            | 175.6666907         | -0.63955           |
| 288.15   | 0.9668           | -5.51725            | 80.98536272         | -0.3002            |
| 298.15   | 0.8275           | -5.70872            | 469.4750327         | -1.59377           |
| 310.15   | 0.6950           | -5.93849            | 938.5528358         | -3.04527           |
| 315.15   | 0.6301           | -6.03422            | 1210.493555         | -3.86015           |

**The thermodynamic parameters calculated PCR of dyes with LSNR.**

**Table (SI-2.2).**  $\Delta G$ ,  $\Delta H$  and  $\Delta S$  for  $E_a = 2.2612$  J/mol of La2S3 for MB under SL.

| Ct (ppm)   | log (Abs) | $\Delta H$ (kJ/mol) | $\Delta G$ (kJ/mol) | $\Delta S$ (kJ/mol) |
|------------|-----------|---------------------|---------------------|---------------------|
| 24.3465046 | 0.204663  | -463.905            | -95.41              | -15.1356            |
| 23.8145897 | 0.195069  | -453.72             | -88.95              | -15.3172            |
| 23.2066869 | 0.183839  | -442.081            | -81.69              | -15.5297            |
| 18.9513678 | 0.095866  | -360.603            | -34.79              | -17.1923            |
| 15.668693  | 0.013259  | -297.749            | -3.978              | -18.749             |

**Table (SI-2.3).**  $\Delta G$ ,  $\Delta H$  and  $\Delta S$  for  $E_a = 1.8151$  J/mol of Ce2S3 for MB under SL.

| Ct (ppm) | log (Absorbance) | $\Delta H$ (kJ/mol) | $\Delta G$ (kJ/mol) | $\Delta S$ (kJ/mol) |
|----------|------------------|---------------------|---------------------|---------------------|
| 25.19757 | 0.219584526      | -480.646            | -105.941            | -14.8707            |
| 24.72644 | 0.211387553      | -471.626            | -100.079            | -15.0263            |
| 24.16413 | 0.201397124      | -460.859            | -93.1812            | -15.2158            |
| 24.11854 | 0.200576927      | -459.986            | -92.6267            | -15.2314            |
| 23.38906 | 0.18723862       | -446.019            | -83.8517            | -15.4845            |

**Table (SI-2.4).**  $\Delta G$ ,  $\Delta H$  and  $\Delta S$  for  $E_a = 2.2612$  J/mol of Tb2S3 for MB under SL.

| Ct (ppm) | log (Abs) | $\Delta H$ (kJ/mol) | $\Delta G$ (kJ/mol) | $\Delta S$ (kJ/mol) |
|----------|-----------|---------------------|---------------------|---------------------|
| 23.03951 | 0.180699  | -438.88             | -79.7138            | -15.5891            |
| 22.46201 | 0.169674  | -427.822            | -72.9741            | -15.7977            |
| 21.94529 | 0.159567  | -417.928            | -67.0485            | -15.9888            |
| 18.86018 | 0.093772  | -358.857            | -33.8627            | -17.2318            |
| 16.56535 | 0.037426  | -314.918            | -11.8709            | -18.294             |

**Table (SI-2.5).**  $\Delta G$ ,  $\Delta H$  and  $\Delta S$  for  $E_a = 2.7322$  J/mol of Ho2S3 for MB under SL.

| Ct (ppm) | log (Abs) | $\Delta H$ (kJ/mol) | $\Delta G$ (kJ/mol) | $\Delta S$ (kJ/mol) |
|----------|-----------|---------------------|---------------------|---------------------|
| 18.99696 | 0.09691   | -361.005            | -35.2498            | -17.1478            |
| 18.22188 | 0.078819  | -346.165            | -27.4998            | -17.488             |
| 17.29483 | 0.056142  | -328.414            | -18.5913            | -17.9142            |
| 14.54407 | -0.01909  | -275.745            | 5.315595            | -19.3248            |
| 13.90578 | -0.03858  | -263.524            | 10.27186            | -19.6893            |

**Table (SI-2.6).**  $\Delta G$ ,  $\Delta H$  and  $\Delta S$  for  $E_a = 2.2325$  J/mol of La2S3 for BBR under SL.

| log (Abs) | Ct (ppm) | 1/Ct     | $\Delta H$ (kJ/mol) | $\Delta G$ (kJ/mol) | $\Delta S$ (kJ/mol) |
|-----------|----------|----------|---------------------|---------------------|---------------------|
| -0.26841  | 21.13725 | 0.04731  | -402.486            | 108.6309            | -24.1808            |
| -0.27572  | 20.78431 | 0.048113 | -395.728            | 109.7272            | -24.3191            |
| -0.27984  | 20.58824 | 0.048571 | -391.973            | 110.3148            | -24.3969            |
| -0.30539  | 19.41176 | 0.051515 | -369.447            | 113.5091            | -24.8796            |
| -0.32698  | 18.47059 | 0.05414  | -351.426            | 115.6391            | -25.287             |

**Table (SI-2.7).**  $\Delta G$ ,  $\Delta H$  and  $\Delta S$  for  $E_a = 1.9683$  J/mol of Ce2S3 for BBR under SL.

| Ct (ppm) | log (Abs) | $\Delta H$ (kJ/mol) | $\Delta G$ (kJ/mol) | $\Delta S$ (kJ/mol) |
|----------|-----------|---------------------|---------------------|---------------------|
| 24.11765 | -0.21112  | -459.816            | 97.4941             | -23.108             |
| 23.84314 | -0.2161   | -454.56             | 98.65405            | -23.2022            |
| 22.78431 | -0.23582  | -434.286            | 102.8792            | -23.5761            |
| 22.39216 | -0.24336  | -426.778            | 104.3412            | -23.719             |
| 20.82353 | -0.27491  | -396.743            | 109.6079            | -24.3163            |

**Table (SI-2.8).**  $\Delta G$ ,  $\Delta H$  and  $\Delta S$  for  $E_a = 2.3742$  J/mol of Tb2S3 for BBR under SL.

| Ct (ppm) | log (Abs) | $\Delta H$ (kJ/mol) | $\Delta G$ (kJ/mol) | $\Delta S$ (kJ/mol) |
|----------|-----------|---------------------|---------------------|---------------------|
| 19.4902  | -0.30364  | -370.807            | 113.3142            | -24.8392            |
| 19.09804 | -0.31247  | -363.299            | 114.2622            | -25.0058            |
| 18.39216 | -0.32883  | -349.783            | 115.7989            | -25.3142            |
| 18.19608 | -0.33348  | -346.029            | 116.1861            | -25.4019            |
| 17.64706 | -0.34679  | -335.517            | 117.1763            | -25.6526            |

**Table (SI-2.9).**  $\Delta G$ ,  $\Delta H$  and  $\Delta S$  for  $E_a = 2.3991$  J/mol of Ho2S3 for BBR under SL.

| Ct (ppm) | log (Abs) | $\Delta H$ (kJ/mol) | $\Delta G$ (kJ/mol) | $\Delta S$ (kJ/mol) |
|----------|-----------|---------------------|---------------------|---------------------|
| 19.4902  | -0.30364  | -370.782            | 113.3142            | -24.838             |
| 19.17647 | -0.31069  | -364.776            | 114.0779            | -24.9709            |
| 18.7451  | -0.32057  | -356.516            | 115.0582            | -25.1572            |
| 18.19608 | -0.33348  | -346.004            | 116.1861            | -25.4005            |
| 17.37255 | -0.3536   | -330.236            | 117.6184            | -25.7794            |



**Table (SI-3.0).**  $\Delta G$ ,  $\Delta H$  and  $\Delta S$  for  $E_a = 2.2574$  J/mol of La2S3 for BBG under SL.

| Ct (ppm) | log (Abs) | $\Delta H$ (kJ/mol) | $\Delta G$ (kJ/mol) | $\Delta S$ (kJ/mol) |
|----------|-----------|---------------------|---------------------|---------------------|
| 20.99526 | -0.3536   | -399.742            | 142.1454            | -25.81              |
| 19.43128 | -0.38722  | -369.796            | 144.0651            | -26.4451            |
| 19.38389 | -0.38828  | -368.889            | 144.1073            | -26.4651            |
| 19.19431 | -0.39254  | -365.259            | 144.2667            | -26.5456            |
| 18.10427 | -0.41794  | -344.388            | 144.8756            | -27.0247            |

**Table (SI-3.1).**  $\Delta G$ ,  $\Delta H$  and  $\Delta S$  for  $E_a = 1.9740$  J/mol of Ce2S3 for BBG under SL.

| Ct (ppm) | log (Abs) | $\Delta H$ (kJ/mol) | $\Delta G$ (kJ/mol) | $\Delta S$ (kJ/mol) |
|----------|-----------|---------------------|---------------------|---------------------|
| 24.59716 | -0.28483  | -468.991            | 134.1463            | -24.5206            |
| 23.36493 | -0.30715  | -445.398            | 137.4116            | -24.9438            |
| 22.93839 | -0.31515  | -437.231            | 138.4174            | -25.0954            |
| 22.8436  | -0.31695  | -435.416            | 138.632             | -25.1295            |
| 20.56872 | -0.36251  | -391.858            | 142.7682            | -25.9922            |

**Table (SI-3.2).**  $\Delta G$ ,  $\Delta H$  and  $\Delta S$  for  $E_a = 2.3244$  J/mol of Tb2S3 for BBG under SL.

| Ct (ppm) | log (Abs) | $\Delta H$ (kJ/mol) | $\Delta G$ (kJ/mol) | $\Delta S$ (kJ/mol) |
|----------|-----------|---------------------|---------------------|---------------------|
| 20.18957 | -0.37059  | -384.248            | 143.2601            | -26.1278            |
| 19.38389 | -0.38828  | -368.822            | 144.1073            | -26.4616            |
| 19.2891  | -0.39041  | -367.007            | 144.1889            | -26.5018            |
| 19.19431 | -0.39254  | -365.192            | 144.2667            | -26.5422            |
| 17.96209 | -0.42136  | -341.598            | 144.9155            | -27.0856            |

**Table (SI-3.3).**  $\Delta G$ ,  $\Delta H$  and  $\Delta S$  for  $E_a = 2.3072$  J/mol of Ho2S3 for BBG under SL.

| Ct (ppm) | Log (Abs) | $\Delta H$ (kJ/mol) | $\Delta G$ (kJ/mol) | $\Delta S$ (kJ/mol) |
|----------|-----------|---------------------|---------------------|---------------------|
| 20.52133 | -0.36351  | -390.618            | 142.8329            | -25.9949            |
| 19.95261 | -0.37572  | -379.728            | 143.5375            | -26.2254            |
| 19.00474 | -0.39686  | -361.579            | 144.4104            | -26.6244            |
| 18.38863 | -0.41117  | -349.782            | 144.7681            | -26.8944            |
| 17.77251 | -0.42597  | -337.986            | 144.9541            | -27.1734            |

**Table (SI-3.4).**  $\Delta G$ ,  $\Delta H$  and  $\Delta S$  for  $E_a = 4.2200$  J/mol of La2S3 for MO under SL.

| Ct (ppm) | Log (Abs) | $\Delta H$ (kJ/mol) | $\Delta G$ (kJ/mol) | $\Delta S$ (kJ/mol) |
|----------|-----------|---------------------|---------------------|---------------------|
| 10.825   | -0.06248  | -203.048            | 12.95053            | -19.9537            |
| 10.7875  | -0.06399  | -202.33             | 13.21696            | -19.9812            |
| 10.675   | -0.06854  | -200.176            | 14.00972            | -20.0642            |
| 10.6375  | -0.07007  | -199.458            | 14.27179            | -20.0921            |
| 10.125   | -0.09151  | -189.645            | 17.74153            | -20.4826            |

**Table (SI-3.5).**  $\Delta G$ ,  $\Delta H$  and  $\Delta S$  for  $E_a = 4.0477$  J/mol of Ce2S3 for MO under SL.

| Ct (ppm) | Log (Abs) | $\Delta H$ (kJ/mol) | $\Delta G$ (kJ/mol) | $\Delta S$ (kJ/mol) |
|----------|-----------|---------------------|---------------------|---------------------|
| 11.25    | -0.04576  | -211.358            | 9.856408            | -19.6635            |
| 10.9875  | -0.05601  | -206.332            | 11.78358            | -19.8512            |
| 10.9125  | -0.05899  | -204.895            | 12.32467            | -19.9056            |
| 10.675   | -0.06854  | -200.348            | 14.00972            | -20.0804            |
| 10.5625  | -0.07314  | -198.194            | 14.79262            | -20.1644            |

**Table (SI-3.6).**  $\Delta G$ ,  $\Delta H$  and  $\Delta S$  for  $E_a = 4.8691$  J/mol of Tb2S3 for MO under SL.

| Ct (ppm) | log (Abs) | $\Delta H$ (kJ/mol) | $\Delta G$ (kJ/mol) | $\Delta S$ (kJ/mol) |
|----------|-----------|---------------------|---------------------|---------------------|
| 9.625    | -0.11351  | -179.422            | 20.91877            | -20.8146            |
| 9.4      | -0.12378  | -175.114            | 22.2787             | -20.9992            |
| 8.875    | -0.14874  | -165.062            | 25.2758             | -21.4465            |
| 8.6875   | -0.15802  | -161.472            | 26.28437            | -21.6122            |
| 8.5      | -0.16749  | -157.882            | 27.25929            | -21.7813            |

**Table (SI-3.7).**  $\Delta G$ ,  $\Delta H$  and  $\Delta S$  for  $E_a = 4.6336$  J/mol of Ho2S3 for MO under SL.

| Ct (ppm) | Log (Abs) | $\Delta H$ (kJ/mol) | $\Delta G$ (kJ/mol) | $\Delta S$ (kJ/mol) |
|----------|-----------|---------------------|---------------------|---------------------|
| 10.625   | -0.07058  | -198.805            | 14.3589             | -20.0625            |
| 10.5625  | -0.07314  | -197.608            | 14.79262            | -20.1089            |
| 10.4125  | -0.07935  | -194.736            | 15.82098            | -20.2216            |
| 10.125   | -0.09151  | -189.231            | 17.74153            | -20.4418            |
| 8.625    | -0.16115  | -160.51             | 26.61312            | -21.6955            |

**Table (SI-3.8).** The  $\Delta G$ ,  $\Delta H$  and  $\Delta S$  for  $E_a = 8.7541$  J/mol of LSNR: GO for BBR under SL.

| $C_i$ (ppm) | Log(abs) | $\Delta H$ (kJ/mol) | $\Delta G$ (kJ/mol) | $\Delta S$ (J/mol) |
|-------------|----------|---------------------|---------------------|--------------------|
| 0.8235      | -1.67778 | -7.0141             | 26.4556             | -40.6419           |
| 2.5098      | -1.19382 | -39.3015            | 57.3697             | -38.5174           |
| 1.8039      | -1.33724 | -25.7858            | 46.1883             | -39.8987           |
| 0.5490      | -1.85387 | -1.7581             | 19.4882             | -38.6985           |

**Table (SI-3.9).** The  $\Delta G$ ,  $\Delta H$  and  $\Delta S$  for  $E_a = 1.4896$  J/mol of *LSNR:GO* for *BBG* under *SL*.

| $C_t$ (ppm) | Log(abs) | $\Delta H$ (kJ/mol) | $\Delta G$ (kJ/mol) | $\Delta S$ (J/mol) |
|-------------|----------|---------------------|---------------------|--------------------|
| 0.0474      | -3.0000  | 0.5822              | 2.722342            | -45.1580           |
| 2.0379      | -1.3665  | -37.5306            | 53.32239            | -44.5814           |
| 0.0474      | -3.0000  | 0.5822              | 2.722342            | -45.1580           |
| 1.7536      | -1.4318  | -32.0860            | 48.07342            | -45.7125           |

$C_t$ , degradation of concentration at time 't'  $\Delta H$ , change in enthalpy (kJ/mol)  $\Delta G$ , change in Gibbs free energy (kJ/mol)  $\Delta S$ , change in entropy (kJ/mol).

**Table (SI-4.0).** The  $\Delta G$ ,  $\Delta H$  and  $\Delta S$  for  $E_a = 10.0446$  J/mol of *LSNR:GO* for *MO* under *SL*.

| $C_t$ (ppm) | Log(abs) | $\Delta H$ (kJ/mol) | $\Delta G$ (kJ/mol) | $\Delta S$ (J/mol) |
|-------------|----------|---------------------|---------------------|--------------------|
| 1.1000      | -1.0555  | -11.0173            | 22.23115            | -30.2258           |
| 1.3375      | -0.9706  | -15.5647            | 24.8568             | -30.2217           |
| 1.3375      | -0.9706  | -15.5647            | 24.8568             | -30.2217           |
| 1.2875      | -0.9872  | -14.6073            | 24.33548            | -30.2469           |

**Table (SI-4.1).** The  $\Delta G$ ,  $\Delta H$  and  $\Delta S$  for  $E_a = 10.5692$  J/mol of *LSNR:GO* for *MB* under *SL*.

| $C_t$ (ppm) | Log(abs) | $\Delta H$ (kJ/mol) | $\Delta G$ (kJ/mol) | $\Delta S$ (J/mol) |
|-------------|----------|---------------------|---------------------|--------------------|
| 0.8663      | -1.2441  | -6.01723            | 20.63559            | -30.7676           |
| 1.9605      | -0.8894  | -26.9685            | 33.38643            | -30.7857           |
| 1.2766      | -1.0757  | -13.874             | 26.29401            | -31.4649           |
| 1.0790      | -1.1487  | -10.0911            | 23.73334            | -31.3471           |

## The thermodynamic parameters calculated by SCR for dyes with LGT

**Table (SI-4.2).**  $\Delta G$ ,  $\Delta H$  and  $\Delta S$  for  $E_a = 0.538$  J of *La<sub>2</sub>S<sub>3</sub>:GO* with *BBG* dye under *SCR*.

| UI, Time (min) | Temp.(K) | Abs (a.u.) | $\Delta H$ (kJ/mol) | $\Delta G$ (kJ/mol) | $\Delta S$ (J/mol) |
|----------------|----------|------------|---------------------|---------------------|--------------------|
| 5              | 298.15   | 0.368      | -5.17072            | 2478.453            | -8.33012           |
| 10             | 301.15   | 0.359      | -5.22816            | 2565.397            | -8.53603           |
| 20             | 305.15   | 0.367      | -5.30475            | 2543.548            | -8.35278           |
| 30             | 308.15   | 0.368      | -5.36219            | 2561.581            | -8.33017           |
| 60             | 313.15   | 0.263      | -5.45793            | 3477.903            | -11.1236           |

UI, ultra-irradiation time (min) Abs, absorbance (a.u.)  $\Delta H$ , change in enthalpy (kJ)  $\Delta G$ , change in Gibbs free energy (kJ)  $\Delta S$ , change in entropy (kJ)

**Table (SI-4.3).**  $\Delta G$ ,  $\Delta H$  and  $\Delta S$  for  $E_a = 0.312$  J of *Ce<sub>2</sub>S<sub>3</sub>:GO* with *BBG* dye under *SCR*.

| UI, Time (min) | Temp.(K) | Abs (a.u.) | $\Delta H$ (kJ/mol) | $\Delta G$ (kJ/mol) | $\Delta S$ (J/mol) |
|----------------|----------|------------|---------------------|---------------------|--------------------|
| 5              | 298.15   | 0.432      | -5.39672            | 2080.921            | -6.99755           |
| 10             | 301.15   | 0.410      | -5.45416            | 2232.751            | -7.43219           |
| 20             | 305.15   | 0.381      | -5.53075            | 2448.551            | -8.04221           |
| 30             | 308.15   | 0.384      | -5.58819            | 2452.526            | -7.97700           |
| 60             | 313.15   | 0.370      | -5.68393            | 2589.031            | -8.28585           |



**Table (SI-4.4).**  $\Delta G$ ,  $\Delta H$  and  $\Delta S$  for  $E_a = 0.478$  J of  $Tb_2S_3:GO$  with BBG dye under SCR.

| UI, Time (min) | Temp.(K) | Abs (a.u.) | $\Delta H$ (kJ/mol) | $\Delta G$ (kJ/mol) | $\Delta S$ (J/mol) |
|----------------|----------|------------|---------------------|---------------------|--------------------|
| 5              | 298.15   | 0.431      | -5.23072            | 2086.667            | -7.01626           |
| 10             | 301.15   | 0.348      | -5.28816            | 2643.328            | -8.79501           |
| 20             | 305.15   | 0.373      | -5.36475            | 2502.398            | -8.21813           |
| 30             | 308.15   | 0.362      | -5.42219            | 2603.704            | -8.46707           |
| 60             | 313.15   | 0.317      | -5.51793            | 2991.613            | -9.57091           |

**Table (SI-4.5).**  $\Delta G$ ,  $\Delta H$  and  $\Delta S$  for  $E_a = 1.292$  J of  $Ho_2S_3:GO$  with BBG dye under SCR.

| UI, Time (min) | Temp.(K) | Abs (a.u.) | $\Delta H$ (kJ/mol) | $\Delta G$ (kJ/mol) | $\Delta S$ (J/mol) |
|----------------|----------|------------|---------------------|---------------------|--------------------|
| 5              | 298.15   | 0.491      | -4.41672            | 1763.529            | -5.92972           |
| 10             | 301.15   | 0.470      | -4.47416            | 1890.737            | -6.29325           |
| 20             | 305.15   | 0.412      | -4.55075            | 2250.059            | -7.38853           |
| 30             | 308.15   | 0.297      | -4.60819            | 3110.838            | -10.1102           |
| 60             | 313.15   | 0.284      | -4.70393            | 3277.864            | -10.4824           |

**Table (SI-4.6).**  $\Delta G$ ,  $\Delta H$  and  $\Delta S$  for  $E_a = 3.1879$  J of  $La_2S_3:GO$  with BBR dye under SCR.

| UI, Time (min) | Temp.(K) | Abs (a.u.) | $\Delta H$ (kJ/mol) | $\Delta G$ (kJ/mol) | $\Delta S$ (J/mol) |
|----------------|----------|------------|---------------------|---------------------|--------------------|
| 5              | 298.15   | 0.307      | -5.70553            | 2927.784            | -9.83897           |
| 10             | 301.15   | 0.213      | -5.76616            | 3872.672            | -12.8788           |
| 20             | 305.15   | 0.165      | -5.84275            | 4572.046            | -15.0021           |
| 30             | 308.15   | 0.094      | -5.90019            | 6058.743            | -19.6808           |
| 60             | 313.15   | 0.068      | -5.99593            | 7000.192            | -22.3733           |

**Table (SI-4.7).**  $\Delta G$ ,  $\Delta H$  and  $\Delta S$  for  $E_a = 0.4537$  J of  $Ce_2S_3:GO$  with BBR dye under SCR.

| UI, Time (min) | Temp.(K) | Abs (a.u.) | $\Delta H$ (kJ/mol) | $\Delta G$ (kJ/mol) | $\Delta S$ (J/mol) |
|----------------|----------|------------|---------------------|---------------------|--------------------|
| 5              | 298.15   | 0.587      | -5.70827            | 3487.080            | -11.71487          |
| 10             | 301.15   | 0.577      | -5.76616            | 4853.018            | -16.13410          |
| 20             | 305.15   | 0.534      | -5.84275            | 6110.100            | -20.04241          |
| 30             | 308.15   | 0.492      | -5.90019            | 6286.664            | -20.42046          |
| 60             | 313.15   | 0.484      | -5.99593            | 7698.751            | -24.60401          |

**Table (SI-4.8).**  $\Delta G$ ,  $\Delta H$  and  $\Delta S$  for  $E_a = 3.0061$  J of  $Tb_2S_3:GO$  with BBR dye under SCR.

| UI, Time (min) | Temp.(K) | Abs (a.u.) | $\Delta H$ (kJ/mol) | $\Delta G$ (kJ/mol) | $\Delta S$ (J/mol) |
|----------------|----------|------------|---------------------|---------------------|--------------------|
| 5              | 298.15   | 0.245      | -5.70571            | 3487.080            | -11.71486          |
| 10             | 301.15   | 0.144      | -5.76616            | 4853.018            | -16.13410          |
| 20             | 305.15   | 0.09       | -5.84275            | 6110.100            | -20.04241          |
| 30             | 308.15   | 0.086      | -5.90019            | 6286.664            | -20.42046          |
| 60             | 313.15   | 0.052      | -5.99593            | 7698.751            | -24.60401          |

**Table (SI-4.9).**  $\Delta G$ ,  $\Delta H$  and  $\Delta S$  for  $E_a = 1.1698$  J of  $\text{Ho}_2\text{S}_3$ :GO with BBR dye under SCR.

| UI, Time (min) | Temp.(K) | Abs (a.u.) | $\Delta H$ (kJ/mol) | $\Delta G$ (kJ/mol) | $\Delta S$ (J/mol) |
|----------------|----------|------------|---------------------|---------------------|--------------------|
| 5              | 298.15   | 0.165      | -5.70755            | 4467.165            | -15.0021           |
| 10             | 301.15   | 0.152      | -5.76616            | 4717.622            | -15.6845           |
| 20             | 305.15   | 0.137      | -5.84275            | 5043.926            | -16.5485           |
| 30             | 308.15   | 0.137      | -5.90019            | 5093.514            | -16.5485           |
| 60             | 313.15   | 0.086      | -5.99593            | 6388.670            | -20.4205           |

**Table (SI-5.0).**  $\Delta G$ ,  $\Delta H$  and  $\Delta S$  for  $E_a = 0.3886$  J of  $\text{La}_2\text{S}_3$ :GO with MB dye under SCR.

| UI, Time (min) | Temp.(K) | Abs (a.u.) | $\Delta H$ (kJ/mol) | $\Delta G$ (kJ/mol) | $\Delta S$ (J/mol) |
|----------------|----------|------------|---------------------|---------------------|--------------------|
| 5              | 298.15   | 0.862      | -5.70833            | 356.549             | -1.21502           |
| 10             | 301.15   | 0.797      | -5.76616            | 550.270             | -1.84638           |
| 20             | 305.15   | 0.759      | -5.84275            | 677.629             | -2.23979           |
| 30             | 308.15   | 0.759      | -5.90019            | 684.291             | -2.23979           |
| 60             | 313.15   | 0.699      | -5.99593            | 903.067             | -2.90296           |

**Table (SI-5.1).**  $\Delta G$ ,  $\Delta H$  and  $\Delta S$  for  $E_a = 0.6835$  J of  $\text{Ce}_2\text{S}_3$ :GO with MB dye under SCR.

| UI, Time (min) | Temp.(K) | Abs (a.u.) | $\Delta H$ (kJ/mol) | $\Delta G$ (kJ/mol) | $\Delta S$ (J/mol) |
|----------------|----------|------------|---------------------|---------------------|--------------------|
| 5              | 298.15   | 0.599      | -5.70804            | 1270.608            | -4.28079           |
| 10             | 301.15   | 0.576      | -5.76616            | 1381.443            | -4.60637           |
| 20             | 305.15   | 0.518      | -5.84275            | 1669.100            | -5.48892           |
| 30             | 308.15   | 0.474      | -5.90019            | 1912.970            | -6.22707           |
| 60             | 313.15   | 0.438      | -5.99593            | 2149.695            | -6.88389           |

**Table (SI-5.2).**  $\Delta G$ ,  $\Delta H$  and  $\Delta S$  for  $E_a = 0.2297$  J of  $\text{Tb}_2\text{S}_3$ :GO with MB dye under SCR.

| UI, Time (min) | Temp.(K) | Abs (a.u.) | $\Delta H$ (kJ/mol) | $\Delta G$ (kJ/mol) | $\Delta S$ (J/mol) |
|----------------|----------|------------|---------------------|---------------------|--------------------|
| 5              | 298.15   | 1.06       | -5.70849            | -144.464            | 0.465389           |
| 10             | 301.15   | 1.009      | -5.76616            | -22.4371            | 0.055358           |
| 20             | 305.15   | 0.989      | -5.84275            | 28.06687            | -0.11112           |
| 30             | 308.15   | 0.965      | -5.90019            | 91.29182            | -0.3154            |
| 60             | 313.15   | 0.944      | -5.99593            | 150.0661            | -0.49836           |

**Table (SI-5.3).**  $\Delta G$ ,  $\Delta H$  and  $\Delta S$  for  $E_a = 0.2738$  J of  $\text{Ho}_2\text{S}_3$ :GO with MB dye under SCR.

| UI, Time (min) | Temp.(K) | Abs (a.u.) | $\Delta H$ (kJ/mol) | $\Delta G$ (kJ/mol) | $\Delta S$ (J/mol) |
|----------------|----------|------------|---------------------|---------------------|--------------------|
| 5              | 298.15   | 0.959      | -5.70845            | 103.792             | -0.36727           |
| 10             | 301.15   | 0.95       | -5.76616            | 128.449             | -0.44568           |
| 20             | 305.15   | 0.943      | -5.84275            | 148.922             | -0.50718           |
| 30             | 308.15   | 0.861      | -5.90019            | 383.494             | -1.26365           |
| 60             | 313.15   | 0.854      | -5.99593            | 410.974             | -1.33153           |

**Table (SI-5.4).**  $\Delta G$ ,  $\Delta H$  and  $\Delta S$  for  $E_a = 0.3331 J$  of  $La_2S_3:GO$  with MO dye under SCR.

| UI, Time (min) | Temp.(K) | Abs (a.u.) | $\Delta H$ (kJ/mol) | $\Delta G$ (kJ/mol) | $\Delta S$ (J/mol) |
|----------------|----------|------------|---------------------|---------------------|--------------------|
| 5              | 298.15   | 1.277      | -5.70839            | -606.214            | 2.014106           |
| 10             | 301.15   | 1.207      | -5.76616            | -471.137            | 1.545314           |
| 20             | 305.15   | 1.207      | -5.84275            | -477.395            | 1.545314           |
| 30             | 308.15   | 1.186      | -5.90019            | -437.114            | 1.399363           |
| 60             | 313.15   | 1.054      | -5.99593            | -136.951            | 0.418185           |

**Table (SI-5.6).**  $\Delta G$ ,  $\Delta H$  and  $\Delta S$  for  $E_a = 0.1340 J$  of  $Ce_2S_3:GO$  with MO dye under SCR.

| UI, Time (min) | Temp.(K) | Abs (a.u.) | $\Delta H$ (kJ/mol) | $\Delta G$ (kJ/mol) | $\Delta S$ (J/mol) |
|----------------|----------|------------|---------------------|---------------------|--------------------|
| 5              | 298.15   | 1.281      | -47.46217           | -613.968            | 1.90007            |
| 10             | 301.15   | 1.272      | -47.93987           | -602.490            | 1.84144            |
| 20             | 305.15   | 1.270      | -48.57663           | -606.499            | 1.828355           |
| 30             | 308.15   | 1.220      | -49.05419           | -509.540            | 1.494355           |
| 60             | 313.15   | 1.207      | -49.85014           | -489.911            | 1.405271           |

**Table (SI-5.7).**  $\Delta G$ ,  $\Delta H$  and  $\Delta S$  for  $E_a = 0.4882 J$  of  $Tb_2S_3:GO$  with MO dye under SCR.

| UI, Time (min) | Temp.(K) | Abs (a.u.) | $\Delta H$ (kJ/mol) | $\Delta G$ (kJ/mol) | $\Delta S$ (J/mol) |
|----------------|----------|------------|---------------------|---------------------|--------------------|
| 5              | 298.15   | 1.307      | -5.70823            | -663.785            | 2.20720            |
| 10             | 301.15   | 1.213      | -5.76616            | -483.555            | 1.58655            |
| 20             | 305.15   | 1.154      | -5.84275            | -363.453            | 1.17192            |
| 30             | 308.15   | 1.093      | -5.90019            | -227.866            | 0.72032            |
| 60             | 313.15   | 1.027      | -5.99593            | -69.3755            | 0.20239            |

**Table (SI-5.8).**  $\Delta G$ ,  $\Delta H$  and  $\Delta S$  for  $E_a = 0.8003 J$  of  $Ho_2S_3:GO$  with MO dye under SCR.

| UI, Time (min) | Temp.(K) | Abs (a.u.) | $\Delta H$ (kJ/mol) | $\Delta G$ (kJ/mol) | $\Delta S$ (J/mol) |
|----------------|----------|------------|---------------------|---------------------|--------------------|
| 5              | 298.15   | 1.205      | -5.70792            | -1229.505           | 4.10464            |
| 10             | 301.15   | 1.177      | -5.76616            | -408.109            | 1.33602            |
| 20             | 305.15   | 1.138      | -5.84275            | -328.025            | 1.05582            |
| 30             | 308.15   | 1.109      | -5.90019            | -265.105            | 0.84116            |
| 60             | 313.15   | 1.045      | -5.99593            | -114.620            | 0.34688            |

**Table (SI-5.9).** Friccohesity velocity of fluid dynamics of LSNR and LGT.

| Temp.(K) | $La_2S_3$ | $Ce_2S_3$ | $Tb_2S_3$ | $Ho_2S_3$ | $La_2S_3:GO$ | $Ce_2S_3:GO$ | $Tb_2S_3:GO$ | $Ho_2S_3:GO$ |
|----------|-----------|-----------|-----------|-----------|--------------|--------------|--------------|--------------|
| 283.15   | 65.144    | 71.068    | 75.830    | 73.483    | 73.970       | 74.027       | 75.936       | 64.692       |
| 288.15   | 67.067    | 70.042    | 72.357    | 72.877    | 70.809       | 70.772       | 70.537       | 71.590       |
| 298.15   | 84.052    | 87.780    | 81.165    | 80.733    | 81.165       | 81.165       | 78.366       | 86.576       |
| 310.15   | 82.424    | 91.217    | 93.148    | 95.657    | 97.692       | 101.257      | 100.202      | 100.724      |
| 315.15   | 81.801    | 98.820    | 104.217   | 110.429   | 111.486      | 110.830      | 118.620      | 203.994      |
| 283.15   | 65.144    | 71.068    | 75.830    | 73.483    | 73.970       | 74.027       | 75.936       | 64.692       |

**Table (SI-6.0).** Friccohesity velocity of fluid dynamics of LSNR and LGT with BSA.

| Temp.(K) | La <sub>2</sub> S <sub>3</sub><br>BSA | Ce <sub>2</sub> S <sub>3</sub><br>BSA | Tb <sub>2</sub> S <sub>3</sub><br>BSA | Ho <sub>2</sub> S <sub>3</sub><br>BSA | La <sub>2</sub> S <sub>3</sub> :GO<br>BSA | Ce <sub>2</sub> S <sub>3</sub> :GO<br>BSA | Tb <sub>2</sub> S <sub>3</sub> :GO<br>BSA | Ho <sub>2</sub> S <sub>3</sub> :GO<br>BSA |
|----------|---------------------------------------|---------------------------------------|---------------------------------------|---------------------------------------|-------------------------------------------|-------------------------------------------|-------------------------------------------|-------------------------------------------|
| 283.15   | 77.190                                | 81.65                                 | 83.299                                | 86.322                                | 85.179                                    | 84.200                                    | 81.625                                    | 81.964                                    |
| 288.15   | 70.270                                | 71.34                                 | 72.128                                | 73.716                                | 73.192                                    | 73.192                                    | 70.839                                    | 71.039                                    |
| 298.15   | 75.754                                | 74.98                                 | 74.316                                | 74.774                                | 74.862                                    | 76.093                                    | 74.774                                    | 74.107                                    |
| 310.15   | 97.396                                | 100.21                                | 99.514                                | 98.952                                | 108.268                                   | 108.128                                   | 108.743                                   | 106.975                                   |
| 315.15   | 120.683                               | 127.31                                | 128.792                               | 126.538                               | 133.625                                   | 130.178                                   | 130.315                                   | 128.782                                   |
| 283.15   | 77.190                                | 81.65                                 | 83.299                                | 86.322                                | 85.179                                    | 84.200                                    | 81.625                                    | 81.964                                    |

**Table (SI-6.1).** Densities (g/cm<sup>3</sup>) of LSNR and LGT.

| Conc. (%) | La <sub>2</sub> S <sub>3</sub> | Ce <sub>2</sub> S <sub>3</sub> | Tb <sub>2</sub> S <sub>3</sub> | Ho <sub>2</sub> S <sub>3</sub> | La <sub>2</sub> S <sub>3</sub> :GO | Ce <sub>2</sub> S <sub>3</sub> :GO | Tb <sub>2</sub> S <sub>3</sub> :GO | Ho <sub>2</sub> S <sub>3</sub> :GO |
|-----------|--------------------------------|--------------------------------|--------------------------------|--------------------------------|------------------------------------|------------------------------------|------------------------------------|------------------------------------|
| 0.002     | 0.997049                       | 0.997097                       | 0.99712                        | 0.997199                       | 0.997191                           | 0.997174                           | 0.997163                           | 0.997148                           |
| 0.006     | 0.997152                       | 0.997146                       | 0.997145                       | 0.997225                       | 0.997206                           | 0.997172                           | 0.997197                           | 0.997179                           |
| 0.010     | 0.997196                       | 0.997194                       | 0.997232                       | 0.997268                       | 0.997226                           | 0.997191                           | 0.997211                           | 0.997195                           |

**Table (SI-6.2).** Densities (g/cm<sup>3</sup>) of LSNR and LGT with BSA.

| Conc. (%) | La <sub>2</sub> S <sub>3</sub><br>BSA | Ce <sub>2</sub> S <sub>3</sub><br>BSA | Tb <sub>2</sub> S <sub>3</sub><br>BSA | Ho <sub>2</sub> S <sub>3</sub><br>BSA | La <sub>2</sub> S <sub>3</sub> :GO<br>BSA | Ce <sub>2</sub> S <sub>3</sub> :GO<br>BSA | Tb <sub>2</sub> S <sub>3</sub> :GO<br>BSA | Ho <sub>2</sub> S <sub>3</sub> :GO<br>BSA |
|-----------|---------------------------------------|---------------------------------------|---------------------------------------|---------------------------------------|-------------------------------------------|-------------------------------------------|-------------------------------------------|-------------------------------------------|
| 0.002     | 0.997217                              | 0.997222                              | 0.997211                              | 0.997233                              | 0.99718                                   | 0.997207                                  | 0.997192                                  | 0.997216                                  |
| 0.006     | 0.997267                              | 0.997271                              | 0.997229                              | 0.997238                              | 0.997244                                  | 0.997258                                  | 0.997263                                  | 0.997272                                  |
| 0.010     | 0.996887                              | 0.997257                              | 0.99721                               | 0.99721                               | 0.997188                                  | 0.997243                                  | 0.997146                                  | 0.997123                                  |

**Table (SI-6.3).** Viscosities (mPa.S) of LSNRs and LGT.

| Conc. (%) | La <sub>2</sub> S <sub>3</sub> | Ce <sub>2</sub> S <sub>3</sub> | Tb <sub>2</sub> S <sub>3</sub> | Ho <sub>2</sub> S <sub>3</sub> | La <sub>2</sub> S <sub>3</sub> :GO | Ce <sub>2</sub> S <sub>3</sub> :GO | Tb <sub>2</sub> S <sub>3</sub> :GO | Ho <sub>2</sub> S <sub>3</sub> :GO |
|-----------|--------------------------------|--------------------------------|--------------------------------|--------------------------------|------------------------------------|------------------------------------|------------------------------------|------------------------------------|
| 0.002     | 0.8865                         | 0.8747                         | 0.8826                         | 0.8905                         | 0.88659                            | 0.8708                             | 0.9023                             | 0.8077                             |
| 0.006     | 0.8826                         | 0.8826                         | 0.8826                         | 0.9024                         | 0.88266                            | 0.8787                             | 0.9063                             | 0.8196                             |
| 0.010     | 0.8748                         | 0.8787                         | 0.8827                         | 0.8945                         | 0.88268                            | 0.8827                             | 0.9142                             | 0.8275                             |

**Table (SI-6.4).** Viscosities (mPa.S) of LSNR and LGT with BSA.

| Conc. (%) | La <sub>2</sub> S <sub>3</sub><br>BSA | Ce <sub>2</sub> S <sub>3</sub><br>BSA | Tb <sub>2</sub> S <sub>3</sub><br>BSA | Ho <sub>2</sub> S <sub>3</sub><br>BSA | La <sub>2</sub> S <sub>3</sub> :GO<br>BSA | Ce <sub>2</sub> S <sub>3</sub> :GO<br>BSA | Tb <sub>2</sub> S <sub>3</sub> :GO<br>BSA | Ho <sub>2</sub> S <sub>3</sub> :GO<br>BSA |
|-----------|---------------------------------------|---------------------------------------|---------------------------------------|---------------------------------------|-------------------------------------------|-------------------------------------------|-------------------------------------------|-------------------------------------------|
| 0.002     | 0.8748                                | 0.8669                                | 0.8866                                | 0.8748                                | 0.8629                                    | 0.8630                                    | 0.8590                                    | 0.8590                                    |
| 0.006     | 0.8670                                | 0.8748                                | 0.8906                                | 0.8866                                | 0.8827                                    | 0.8748                                    | 0.8748                                    | 0.8709                                    |
| 0.010     | 0.8824                                | 0.8786                                | 0.8865                                | 0.8747                                | 0.8866                                    | 0.8786                                    | 0.8746                                    | 0.8825                                    |

**Table (SI-6.5).** Surface tension (mN/m) of LSNR and LGT.

| Conc. (%) | La <sub>2</sub> S <sub>3</sub> | Ce <sub>2</sub> S <sub>3</sub> | Tb <sub>2</sub> S <sub>3</sub> | Ho <sub>2</sub> S <sub>3</sub> | La <sub>2</sub> S <sub>3</sub> :GO | Ce <sub>2</sub> S <sub>3</sub> :GO | Tb <sub>2</sub> S <sub>3</sub> :GO | Ho <sub>2</sub> S <sub>3</sub> :GO |
|-----------|--------------------------------|--------------------------------|--------------------------------|--------------------------------|------------------------------------|------------------------------------|------------------------------------|------------------------------------|
| 0.002     | 72.200                         | 72.204                         | 71.632                         | 71.074                         | 72.2106                            | 71.6363                            | 72.209                             | 71.634                             |
| 0.006     | 72.208                         | 71.634                         | 71.634                         | 71.640                         | 72.2117                            | 71.6362                            | 72.211                             | 71.637                             |
| 0.010     | 71.074                         | 71.638                         | 71.640                         | 72.216                         | 71.6401                            | 71.6375                            | 71.639                             | 71.638                             |

**Table (SI-6.6).** Surface tension (mN/m) of LSNR and LGT with BSA.

| Conc. (%) | La <sub>2</sub> S <sub>3</sub><br>BSA | Ce <sub>2</sub> S <sub>3</sub><br>BSA | Tb <sub>2</sub> S <sub>3</sub><br>BSA | Ho <sub>2</sub> S <sub>3</sub><br>BSA | La <sub>2</sub> S <sub>3</sub> :GO<br>BSA | Ce <sub>2</sub> S <sub>3</sub> :GO<br>BSA | Tb <sub>2</sub> S <sub>3</sub> :GO<br>BSA | Ho <sub>2</sub> S <sub>3</sub> :GO<br>BSA |
|-----------|---------------------------------------|---------------------------------------|---------------------------------------|---------------------------------------|-------------------------------------------|-------------------------------------------|-------------------------------------------|-------------------------------------------|
| 0.002     | 0.8748                                | 0.8669                                | 0.8866                                | 0.8748                                | 0.8629                                    | 0.8630                                    | 0.8590                                    | 0.8590                                    |
| 0.006     | 0.8670                                | 0.8748                                | 0.8906                                | 0.8866                                | 0.8827                                    | 0.8748                                    | 0.8748                                    | 0.8709                                    |
| 0.010     | 0.8824                                | 0.8786                                | 0.8865                                | 0.8747                                | 0.8866                                    | 0.8786                                    | 0.8746                                    | 0.8825                                    |



**Table (SI-6.7).** Friccohesity (cm/S) of *LSNR* and *LGT*.

| Conc. (%) | $La_2S_3$<br>( $10^{-4}$ ) | $Ce_2S_3$<br>( $10^{-4}$ ) | $Tb_2S_3$<br>( $10^{-4}$ ) | $Ho_2S_3$<br>( $10^{-4}$ ) | $La_2S_3:GO$<br>( $10^{-4}$ ) | $Ce_2S_3:GO$<br>( $10^{-4}$ ) | $Tb_2S_3:GO$<br>( $10^{-4}$ ) | $Ho_2S_3:GO$<br>( $10^{-4}$ ) |
|-----------|----------------------------|----------------------------|----------------------------|----------------------------|-------------------------------|-------------------------------|-------------------------------|-------------------------------|
| 0.002     | 123                        | 121                        | 123                        | 125                        | 123                           | 122                           | 125                           | 113                           |
| 0.006     | 122                        | 123                        | 123                        | 126                        | 122                           | 123                           | 125                           | 114                           |
| 0.010     | 123                        | 123                        | 123                        | 124                        | 123                           | 123                           | 128                           | 115                           |

**Table (SI-6.8).** Friccohesity (cm/S) of *LSNR* and *LGT* with *BSA*.

| Conc. (%) | <i>BSA</i><br>( $10^{-4}$ ) | $La_2S_3$<br>( $10^{-4}$ ) | $Ce_2S_3$<br>( $10^{-4}$ ) | $Tb_2S_3$<br>( $10^{-4}$ ) | $Ho_2S_3$<br>( $10^{-4}$ ) | $La_2S_3:GO$<br>( $10^{-4}$ ) | $Ce_2S_3:GO$<br>( $10^{-4}$ ) | $Tb_2S_3:GO$<br>( $10^{-4}$ ) | $Ho_2S_3:GO$<br>( $10^{-4}$ ) |
|-----------|-----------------------------|----------------------------|----------------------------|----------------------------|----------------------------|-------------------------------|-------------------------------|-------------------------------|-------------------------------|
| 0.002     | 130                         | 130                        | 128                        | 131                        | 130                        | 130                           | 129                           | 128                           | 128                           |
| 0.006     | 129                         | 128                        | 130                        | 132                        | 132                        | 131                           | 130                           | 129                           | 120                           |
| 0.010     | 132                         | 132                        | 133                        | 135                        | 134                        | 134                           | 131                           | 134                           | 135                           |

**Table (SI-6.9).** Isentropic compressibility of *LSNR* and *LGT*.

| Conc. (%) | $La_2S_3$<br>( $10^{-7}$ ) | $Ce_2S_3$<br>( $10^{-7}$ ) | $Tb_2S_3$<br>( $10^{-7}$ ) | $Ho_2S_3$<br>( $10^{-7}$ ) | $La_2S_3:GO$<br>( $10^{-7}$ ) | $Ce_2S_3:GO$<br>( $10^{-7}$ ) | $Tb_2S_3:GO$<br>( $10^{-7}$ ) | $Ho_2S_3:GO$<br>( $10^{-7}$ ) |
|-----------|----------------------------|----------------------------|----------------------------|----------------------------|-------------------------------|-------------------------------|-------------------------------|-------------------------------|
| 0.002     | 4.4753                     | 4.4757                     | 4.4767                     | 4.4769                     | 4.4750                        | 4.4754                        | 4.4767                        | 4.4752                        |
| 0.006     | 4.4752                     | 4.4756                     | 4.4772                     | 4.4750                     | 4.4757                        | 4.4669                        | 4.4772                        | 4.4750                        |
| 0.010     | 4.4760                     | 4.4762                     | 4.4749                     | 4.4745                     | 4.4749                        | 4.4752                        | 4.4749                        | 4.4747                        |

**Table (SI-7.0).** Isentropic compressibility of *LSNR* and *LGT* with *BSA*.

| Conc. (%) | <i>BSA</i><br>( $10^{-7}$ ) | $La_2S_3$<br>( $10^{-7}$ ) | $Ce_2S_3$<br>( $10^{-7}$ ) | $Tb_2S_3$<br>( $10^{-7}$ ) | $Ho_2S_3$<br>( $10^{-7}$ ) | $La_2S_3:GO$<br>( $10^{-7}$ ) | $Ce_2S_3:GO$<br>( $10^{-7}$ ) | $Tb_2S_3:GO$<br>( $10^{-7}$ ) | $Ho_2S_3:GO$<br>( $10^{-7}$ ) |
|-----------|-----------------------------|----------------------------|----------------------------|----------------------------|----------------------------|-------------------------------|-------------------------------|-------------------------------|-------------------------------|
| 0.002     | 4.4751                      | 4.4747                     | 4.4750                     | 4.4749                     | 4.4753                     | 4.4748                        | 4.4745                        | 4.4745                        | 4.4752                        |
| 0.006     | 4.4748                      | 4.4749                     | 4.4740                     | 4.4732                     | 4.4732                     | 4.4739                        | 4.4743                        | 4.4752                        | 4.4746                        |
| 0.010     | 4.4731                      | 4.4639                     | 4.4726                     | 4.4731                     | 4.4729                     | 4.4711                        | 4.4707                        | 4.4699                        | 4.4695                        |

## The thermodynamic parameters calculated by PCR for dyes with GO.

**Table (SI-7.1).**  $\Delta G$ ,  $\Delta H$  and  $\Delta S$  for  $E_a = 3.8524$  J/mol of GO for MB under SL.

| log (Abs) | Ct          | $\Delta H$ | $\Delta G$  | $\Delta S$   |
|-----------|-------------|------------|-------------|--------------|
| -0.10237  | 12.00607903 | -226.03    | 23.53369924 | -20.78641984 |
| -0.1107   | 11.7781155  | -221.665   | 24.96437563 | -20.93961683 |
| -0.11805  | 11.58054711 | -217.882   | 26.17464124 | -21.07470561 |
| -0.1261   | 11.36778116 | -213.808   | 27.44664378 | -21.22267842 |
| -0.14267  | 10.94224924 | -205.66    | 29.89066814 | -21.52675039 |

**Table (SI-7.2).**  $\Delta G$ ,  $\Delta H$  and  $\Delta S$  for  $E_a = 1.9396$  J/mol of GO for BBR under SL.

| log (Abs) | $C_t$ (ppm) | $\Delta H$ (kJ/mol) | $\Delta G$ (kJ/mol) | $\Delta S$ (kJ/mol) |
|-----------|-------------|---------------------|---------------------|---------------------|
| -0.18977  | 25.33333    | -483.121            | 92.04879            | -22.7041            |
| -0.20551  | 24.43137    | -465.851            | 96.13663            | -23.0027            |
| -0.23582  | 22.78431    | -434.315            | 102.8792            | -23.5774            |
| -0.27572  | 20.78431    | -396.021            | 109.7272            | -24.3332            |
| -0.27737  | 20.70588    | -394.519            | 109.9641            | -24.3642            |

**Table (SI-7.3).**  $\Delta G$ ,  $\Delta H$  and  $\Delta S$  for  $E_a = 2.2478$  J/mol of GO for BBG under SL.

| log (Abs) | $C_t$ (ppm) | $\Delta H$ (kJ/mol) | $\Delta G$ (kJ/mol) | $\Delta S$ (kJ/mol) |
|-----------|-------------|---------------------|---------------------|---------------------|
| -0.35262  | 21.04265    | -400.659            | 142.0718            | -25.7919            |
| -0.35754  | 20.80569    | -396.122            | 142.4312            | -25.8849            |
| -0.36151  | 20.61611    | -392.492            | 142.7026            | -25.96              |
| -0.36452  | 20.47393    | -389.77             | 142.8967            | -26.0168            |
| -0.40894  | 18.48341    | -351.657            | 144.7241            | -26.8555            |

**Table (SI-7.4).**  $\Delta G$ ,  $\Delta H$  and  $\Delta S$  for  $E_a = 3.5977$  J/mol of GO for MO under SL.

| $C_t$ (ppm) | Log (Abs)    | $\Delta H$ (kJ/mol) | $\Delta G$ (kJ/mol) | $\Delta S$ (kJ/mol) |
|-------------|--------------|---------------------|---------------------|---------------------|
| 12.8375     | 0.011570444  | -242.2037354        | -2.84403            | -18.6454            |
| 12.725      | 0.007747778  | -240.049682         | -1.88773            | -18.7161            |
| 12.6125     | 0.003891166  | -237.8956285        | -0.93969            | -18.7874            |
| 12.3375     | -0.005682847 | -232.6301644        | 1.342447            | -18.9643            |
| 11.7375     | -0.027334408 | -221.1418792        | 6.143123            | -19.364             |

**Table (SI-7.5).** Isentropic compressibility of *LSNR* and *LGT*.

| Temp.(K) | $La_2S_3$<br>( $10^{-7}$ ) | $Ce_2S_3$<br>( $10^{-7}$ ) | $Tb_2S_3$<br>( $10^{-7}$ ) | $Ho_2S_3$<br>( $10^{-7}$ ) | $La_2S_3:GO$<br>( $10^{-7}$ ) | $Ce_2S_3:GO$<br>( $10^{-7}$ ) | $Tb_2S_3:GO$<br>( $10^{-7}$ ) | $Ho_2S_3:GO$<br>( $10^{-7}$ ) |
|----------|----------------------------|----------------------------|----------------------------|----------------------------|-------------------------------|-------------------------------|-------------------------------|-------------------------------|
| 283.15   | 4.7678                     | 4.7596                     | 4.7580                     | 4.7604                     | 4.7605                        | 4.7621                        | 4.7622                        | 4.7648                        |
| 288.15   | 4.6546                     | 4.6503                     | 4.6492                     | 4.6497                     | 4.6510                        | 4.6519                        | 4.6512                        | 4.6522                        |
| 298.15   | 4.4760                     | 4.4762                     | 4.4759                     | 4.4745                     | 4.4750                        | 4.4752                        | 4.4749                        | 4.4743                        |
| 310.15   | 4.3356                     | 4.3346                     | 4.3352                     | 4.3353                     | 4.3301                        | 4.3320                        | 4.3329                        | 4.3343                        |
| 315.15   | 4.2973                     | 4.2931                     | 4.2976                     | 4.2986                     | 4.2878                        | 4.2882                        | 4.2966                        | 4.2935                        |

**Table (SI-7.6).** Isentropic compressibility of *LSNR* and *LGT* with *BSA*.

| Temp.(K) | BSA<br>( $10^{-7}$ ) | $La_2S_3$<br>BSA( $10^{-7}$ ) | $Ce_2S_3$<br>BSA( $10^{-7}$ ) | $Tb_2S_3$<br>BSA( $10^{-7}$ ) | $Ho_2S_3$<br>BSA( $10^{-7}$ ) | $La_2S_3:GO$<br>BSA( $10^{-7}$ ) | $Ce_2S_3:GO$<br>BSA( $10^{-7}$ ) | $Tb_2S_3:GO$<br>BSA( $10^{-7}$ ) | $Ho_2S_3:GO$<br>BSA( $10^{-7}$ ) |
|----------|----------------------|-------------------------------|-------------------------------|-------------------------------|-------------------------------|----------------------------------|----------------------------------|----------------------------------|----------------------------------|
| 283.15   | 4.7628               | 4.7437                        | 4.7618                        | 4.7578                        | 4.7589                        | 4.7602                           | 4.7616                           | 4.7574                           | 4.7566                           |
| 288.15   | 4.6376               | 4.6376                        | 4.6506                        | 4.6497                        | 4.6499                        | 4.6479                           | 4.6487                           | 4.6463                           | 4.6461                           |
| 298.15   | 4.4639               | 4.4639                        | 4.4726                        | 4.4731                        | 4.4730                        | 4.4712                           | 4.4707                           | 4.4700                           | 4.4695                           |
| 310.15   | 4.3155               | 4.3155                        | 4.3277                        | 4.3231                        | 4.3243                        | 4.3298                           | 4.3317                           | 4.3295                           | 4.3257                           |
| 315.15   | 4.2844               | 4.2680                        | 4.2864                        | 4.2750                        | 4.2790                        | 4.2896                           | 4.2923                           | 4.2904                           | 4.2889                           |

**Table (SI-7.7).** MB @SCR and  $\Phi$  LGT under SCR.

| $La_2S_3:GO$ |            | $La_2S_3:GO$ |            | $La_2S_3:GO$ |            | $La_2S_3:GO$ |            |
|--------------|------------|--------------|------------|--------------|------------|--------------|------------|
| @SCR (%)     | $\Phi$ (%) |
| 34.50        | 13.80      | 54.48        | 40         | 19.45        | 46.00      | 27.13        | 51.15      |
| 39.44        | 20.30      | 56.23        | 42         | 23.33        | 48.60      | 27.81        | 51.60      |
| 42.33        | 24.10      | 60.64        | 48         | 24.85        | 49.62      | 28.34        | 51.96      |
| 42.33        | 24.10      | 63.98        | 53         | 26.67        | 50.84      | 34.57        | 56.14      |
| 46.88        | 30.10      | 66.72        | 56         | 28.27        | 51.91      | 35.11        | 56.50      |

**Table (SI-7.8).** BBR @SCR and  $\Phi$  under SCR.

| $La_2S_3:GO$ |            | $La_2S_3:GO$ |            | $La_2S_3:GO$ |            | $La_2S_3:GO$ |            |
|--------------|------------|--------------|------------|--------------|------------|--------------|------------|
| @SCR (%)     | $\Phi$ (%) |
| 39.80        | 71.99      | 42.45        | 46.44      | 51.96        | 77.65      | 67.65        | 84.95      |
| 58.24        | 80.57      | 43.43        | 47.35      | 71.76        | 86.86      | 70.20        | 86.13      |
| 67.65        | 84.95      | 47.65        | 51.28      | 82.35        | 91.79      | 73.14        | 87.50      |
| 81.57        | 91.42      | 51.76        | 55.11      | 83.14        | 92.15      | 73.14        | 87.50      |
| 86.67        | 93.80      | 52.55        | 55.84      | 89.80        | 95.26      | 83.14        | 92.15      |

**Table (SI-7.9).** BBG @SCR and  $\Phi$  under SCR.

| $La_2S_3:GO$ |            | $La_2S_3:GO$ |            | $La_2S_3:GO$ |            | $La_2S_3:GO$ |            |
|--------------|------------|--------------|------------|--------------|------------|--------------|------------|
| @SCR (%)     | $\Phi$ (%) |
| 56.40        | 54.00      | 48.82        | 46.00      | 48.93        | 46.13      | 41.82        | 38.63      |
| 57.46        | 55.13      | 51.42        | 48.75      | 58.77        | 56.50      | 44.31        | 41.25      |
| 56.52        | 54.13      | 54.86        | 52.38      | 55.81        | 53.38      | 51.18        | 48.50      |
| 56.40        | 54.00      | 54.50        | 52.00      | 57.11        | 54.75      | 64.81        | 62.88      |
| 68.84        | 67.13      | 56.16        | 53.75      | 62.44        | 60.38      | 66.35        | 64.50      |

**Table (SI-8.0).** MO @SCR and  $\Phi$  under SCR.

| $La_2S_3:GO$ |            | $Ce_2S_3:GO$ |            | $Tb_2S_3:GO$ |            | $Ho_2S_3:GO$ |            |
|--------------|------------|--------------|------------|--------------|------------|--------------|------------|
| @SCR (%)     | $\Phi$ (%) |
| 20.19        | 22.23      | 19.94        | 21.99      | 18.31        | 20.40      | 24.69        | 26.61      |
| 24.56        | 26.49      | 20.50        | 22.53      | 24.19        | 26.13      | 26.44        | 28.32      |
| 24.56        | 26.49      | 20.63        | 22.66      | 27.88        | 29.72      | 28.88        | 30.69      |
| 25.88        | 27.77      | 23.75        | 25.70      | 31.69        | 33.43      | 30.69        | 32.46      |
| 34.13        | 35.81      | 24.56        | 26.49      | 35.81        | 37.45      | 34.69        | 36.36      |

**Table (SI-8.1).** Densities (g/cm<sup>3</sup>) of LSNR and LGT.

| Temp.(K) | $La_2S_3$ | $Ce_2S_3$ | $Tb_2S_3$ | $Ho_2S_3$ | $La_2S_3:GO$ | $Ce_2S_3:GO$ | $Tb_2S_3:GO$ | $Ho_2S_3:GO$ |
|----------|-----------|-----------|-----------|-----------|--------------|--------------|--------------|--------------|
| 283.15   | 0.999292  | 1.000000  | 0.999900  | 0.999940  | 0.999848     | 1.000100     | 0.999900     | 1.000000     |
| 288.15   | 0.998894  | 0.999305  | 0.999277  | 0.999306  | 0.999219     | 0.999298     | 0.999263     | 0.999277     |
| 298.15   | 0.997196  | 0.997194  | 0.997232  | 0.997268  | 0.997226     | 0.997191     | 0.997211     | 0.997195     |
| 310.15   | 0.993533  | 0.993517  | 0.993498  | 0.993547  | 0.993475     | 0.993499     | 0.993500     | 0.993529     |
| 315.15   | 0.991740  | 0.992064  | 0.99126   | 0.99136   | 0.991752     | 0.992484     | 0.99094      | 0.992384     |

**Table (SI-8.2).** Densities (g/cm<sup>3</sup>) of LSNR and LGT with BSA.

| Temp. (K) | BSA      | $La_2S_3$ BSA | $Ce_2S_3$ BSA | $Tb_2S_3$ BSA | $Ho_2S_3$ BSA | $La_2S_3:GO$ BSA | $Ce_2S_3:GO$ BSA | $Tb_2S_3:GO$ BSA | $Ho_2S_3:GO$ BSA |
|-----------|----------|---------------|---------------|---------------|---------------|------------------|------------------|------------------|------------------|
| 283.15    | 0.999981 | 0.999500      | 0.999949      | 0.999928      | 0.999939      | 0.999200         | 0.99988          | 0.999802         | 0.999621         |
| 288.15    | 0.999328 | 0.998931      | 0.999301      | 0.999267      | 0.999275      | 0.999238         | 0.999295         | 0.999213         | 0.999197         |
| 298.15    | 0.997283 | 0.996887      | 0.997257      | 0.99721       | 0.997210      | 0.997188         | 0.997243         | 0.997146         | 0.997123         |
| 310.15    | 0.993432 | 0.992953      | 0.993461      | 0.993302      | 0.993357      | 0.991799         | 0.993089         | 0.993045         | 0.992637         |
| 315.15    | 0.991885 | 0.990156      | 0.991597      | 0.991992      | 0.991683      | 0.988960         | 0.991528         | 0.991066         | 0.989349         |

**Table (SI-8.3).** PCR data for reduction of methylene blue through LSNR: GO under SL.

| System        | $\Delta$ Abs | $\Delta$ C (ppm) | m, (Kg, $10^{-5}$ ) | $E_{used}$ (J/Kg) ( $10^{12}$ ) | $n_a$ & $n_e$ ( $10^{45}$ ) | Abs. Rate (%) | $\Phi$ (%) |
|---------------|--------------|------------------|---------------------|---------------------------------|-----------------------------|---------------|------------|
| $La_2S_3: GO$ | 1.843        | 28.01            | 2.801               | 2.5173                          | 3.80                        | 96            | 97         |
| $Ce_2S_3: GO$ | 1.771        | 26.91            | 2.691               | 2.4190                          | 3.65                        | 90            | 93         |
| $Tb_2S_3: GO$ | 1.816        | 27.60            | 2.760               | 2.4805                          | 3.74                        | 94            | 96         |
| $Ho_2S_3: GO$ | 1.829        | 27.80            | 2.780               | 2.4982                          | 3.77                        | 95            | 96         |

$\Delta$ Abs, change in absorbance  $\Delta$ C, change in concentration (ppm) m, mass of sample (Kg)  $E_{used}$ , energy used during PCR (J/Kg)  $n_a$  &  $n_e$ , number of photons absorbed and emitted during PCR Abs. rate, rate of adsorption (%)  $\Phi$ , Quantum yield (%).

**Table (SI-8.4).** PCR data for reduction of methylene orange through LSNR: GO under SL.

| System        | $\Delta$ Abs | $\Delta$ C (ppm) | m, (Kg, $10^{-5}$ ) | $E_{used}$ (J/Kg) ( $10^{12}$ ) | $n_a$ & $n_e$ ( $10^{45}$ ) | Abs. Rate (%) | $\Phi$ (%) |
|---------------|--------------|------------------|---------------------|---------------------------------|-----------------------------|---------------|------------|
| $La_2S_3: GO$ | 1.530        | 19.13            | 1.913               | 1.7189                          | 2.59                        | 95            | 95         |
| $Ce_2S_3: GO$ | 1.511        | 18.89            | 1.889               | 1.6975                          | 2.56                        | 93            | 93         |
| $Tb_2S_3: GO$ | 1.511        | 18.89            | 1.889               | 1.6975                          | 2.56                        | 93            | 93         |
| $Ho_2S_3: GO$ | 1.515        | 18.94            | 1.894               | 1.7020                          | 2.57                        | 94            | 94         |

**Table (SI-8.5).** PCR data for reduction of brilliant blue-R through LSNR: GO under SL.

| System        | $\Delta$ Abs | $\Delta$ C (ppm) | m, (Kg, $10^{-5}$ ) | $E_{used}$ (J/Kg) ( $10^{12}$ ) | $n_a$ & $n_e$ ( $10^{45}$ ) | Abs. Rate (%) | $\Phi$ (%) |
|---------------|--------------|------------------|---------------------|---------------------------------|-----------------------------|---------------|------------|
| $La_2S_3: GO$ | 1.106        | 43.37            | 4.337               | 3.898                           | 5.88                        | 96            | 98         |
| $Ce_2S_3: GO$ | 1.063        | 41.69            | 4.169               | 3.747                           | 5.65                        | 87            | 94         |
| $Tb_2S_3: GO$ | 1.081        | 42.39            | 4.239               | 3.810                           | 5.75                        | 91            | 96         |
| $Ho_2S_3: GO$ | 1.113        | 43.65            | 4.365               | 3.923                           | 5.92                        | 97            | 99         |

**Table (SI-8.6).** PCR data for reduction of brilliant blue-G through LSNR: GO under SL.

| System        | $\Delta$ Abs | $\Delta$ C (ppm) | m, (Kg, $10^{-5}$ ) | $E_{used}$ (J/Kg) ( $10^{12}$ ) | $n_a$ & $n_e$ ( $10^{45}$ ) | Abs. Rate (%) | $\Phi$ (%) |
|---------------|--------------|------------------|---------------------|---------------------------------|-----------------------------|---------------|------------|
| $La_2S_3: GO$ | 0.781        | 37.01            | 3.7014              | 3.3267                          | 5.0206                      | 100           | 100        |
| $Ce_2S_3: GO$ | 0.738        | 34.98            | 3.4976              | 3.1435                          | 4.7442                      | 90            | 94         |
| $Tb_2S_3: GO$ | 0.781        | 37.01            | 3.7014              | 3.3267                          | 5.0206                      | 100           | 100        |
| $Ho_2S_3: GO$ | 0.744        | 35.26            | 3.5261              | 3.1691                          | 4.7827                      | 91            | 95         |

**Table (SI-8.7).** C, H, N, and S analysis of GO, and LGT.

## EuroEA Elemental Analyser

**AutoRun name** : KK211122-KK21112022 (18)  
**Date of print** :  
**Time of print** : 21 Nov 2022  
 12:47:29  
**Balance Operator** :  
**Operator** :  
**Configuration** : EVR  
 EVR  
 CHNS  
**Calibration Type** :

Linear

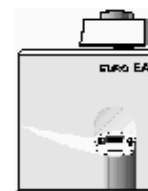



## Results Summary for Element %

| #  | Type | Name           | N %    | C %    | H %   | S %    | O % | Weight (mg) |
|----|------|----------------|--------|--------|-------|--------|-----|-------------|
| 1  | Std  | Sulphanilamide | 15.982 | 41.533 | 4.715 | 18.8   | -   | 0.5900      |
| 2  | Std  | Sulphanilamide | 16.402 | 42.179 | 4.677 | 18.499 | -   | 0.7250      |
| 3  | Std  | Sulphanilamide | 16.399 | 41.792 | 4.646 | 18.576 | -   | 0.9170      |
| 4  | Std  | Sulphanilamide | 16.327 | 41.905 | 4.698 | 18.602 | -   | 1.1260      |
| 5  | Std  | Sulphanilamide | 16.180 | 41.800 | 4.685 | 18.654 | -   | 1.3760      |
| 6  | Smp  | GO             | -      | 60.558 | 3.306 | -      | -   | 1.0752      |
| 7  | Smp  | La2S3-GO       | -      | 18.782 | 2.669 | 2.134  | -   | 1.0756      |
| 8  | Smp  | Ce2S3-GO       | -      | 20.915 | 1.799 | 2.642  | -   | 1.0995      |
| 9  | Smp  | Tb2S3-GO       | -      | 19.264 | 2.480 | 1.764  | -   | 1.0299      |
| 10 | Smp  | Ho2S3-GO       | -      | 25.024 | 2.475 | 1.964  | -   | 1.0295      |

21 Nov 2022

12:47:29

AutoRun: KK211122-KK21112022 (18)

Page 1 of 1
